# Supplementary material for: Genetic variants alter T-bet binding and gene expression in mucosal inflammatory disease
Source: PubMed Central journal article supplement (PMC5328407; doi:10.1371/journal.pgen.1006587), 2017-02-10

# S4 Figure

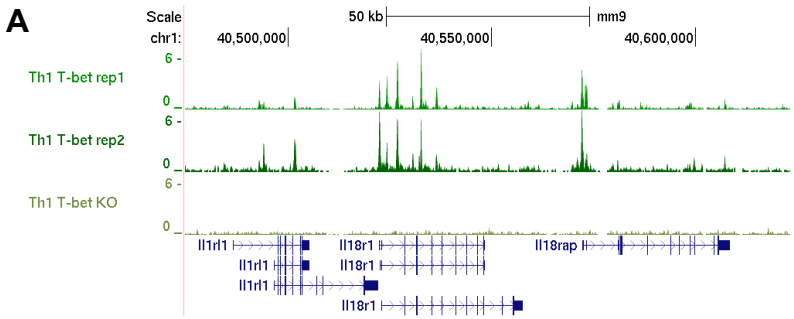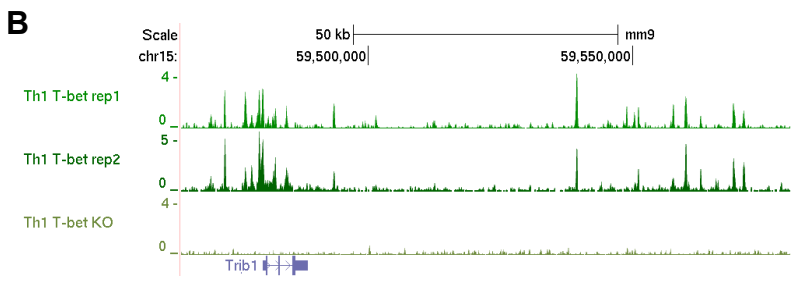

Supplement: pgen.1006587.s004.pdf [file pgen.1006587.s004.pdf]
