# Supplementary material for: Genetic variants alter T-bet binding and gene expression in mucosal inflammatory disease
Source: PLoS Genet. 2017 Feb 10;13(2):e1006587. doi: 10.1371/journal.pgen.1006587 (PMC5328407; doi:10.1371/journal.pgen.1006587)
Supplement: S2 Table — (XLS) [file pgen.1006587.s006.xls]

## Sheet: Crohn's
Dataset	llike.ratio	p value	Odds Ratio
Th1_H3K27ac_active_enhancers	31.159	2.92242e-15	3.53615
Th2_H3K27ac_active_enhancers	30.801	4.20391e-15	3.60915
T-bet_Th1_10-7-peaks	28.508	4.32281e-14	4.64096
wgEncodeUwDnaseTh2	25.949	5.84599e-13	4.62241
wgEncodeBroadHistoneGm12878H3k4me2StdAln	19.769	3.21737e-10	3.14841
wgEncodeUwDnaseMonocytesCD14RO01746	17.521	3.2267e-09	4.09123
wgEncodeBroadHistoneGm12878H3k4me1StdAln	17.22	4.39596e-09	2.77346
POLR2A_all	16.678	7.67407e-09	3.35922
GATA3_Th1	16.618	8.16253e-09	4.4926
wgEncodeOpenChromFaireGm18507Pk	15.709	2.08043e-08	3.51911
wgEncodeBroadHistoneGm12878H3k27acStdAln	12.981	3.48204e-07	2.7301
wgEncodeBroadHistoneK562H3k4me1StdAln	12.852	3.98001e-07	2.51404
wgEncodeOpenChromFaireGm19239Pk	12.837	4.04237e-07	3.21136
wgEncodeBroadHistoneGm12878H3k4me3StdAln	12.233	7.56328e-07	2.75482
MTA3_all	11.678	1.34623e-06	3.98962
MAX_all	11.054	2.57733e-06	3.40187
STAT3_all	10.633	3.9976e-06	3.58022
wgEncodeOpenChromFaireGm12891Pk	10.595	4.15929e-06	2.96621
ATF2_all	10.472	4.72907e-06	3.76431
NFIC_all	10.104	6.94618e-06	3.52095
wgEncodeBroadHistoneGm12878H3k9acStdAln	9.942	8.22861e-06	2.74915
GATA3_Th2	9.905	8.5534e-06	4.28205
BCLAF1_all	9.72	1.0381e-05	4.16879
wgEncodeBroadHistoneGm12878H2azStdAln	9.698	1.06229e-05	2.82307
wgEncodeUwDnaseHL60	9.643	1.12528e-05	3.49814
FOXM1_all	9.124	1.93929e-05	3.64864
wgEncodeBroadHistoneGm12878H3k36me3StdAln	8.511	3.69492e-05	1.99575
MYC_all	8.313	4.55227e-05	2.91617
RUNX3_all	8.212	5.064e-05	3.39635
wgEncodeBroadHistoneGm12878H3k79me2StdAln	7.957	6.62866e-05	2.01355
wgEncodeUwDnaseHAEpiC	7.912	6.95152e-05	3.22868
wgEncodeUwDnaseHAc	7.57	9.98256e-05	3.15353
RELA_all	7.553	0.00010164	3.55536
wgEncodeDukeDnaseGM19239	7.503	0.00010717	3.2063
MEF2C_all	7.397	0.000119916	4.11189
wgEncodeBroadHistoneOsteoblH3k4me1StdAln	7.365	0.000124057	1.87633
CEBPB_all	7.261	0.000138532	2.95606
wgEncodeBroadHistoneOsteoblH3k27acStdAln	7.216	0.000145312	1.91749
POU2F2_all	7.147	0.000156362	3.76421
wgEncodeUwDnaseGM12864	7.135	0.000158369	3.32411
EBF1_all	7.088	0.00016648	3.41137
wgEncodeBroadHistoneNhaH3k4me1StdAln	7.081	0.000167724	1.99661
WRNIP1_all	7.033	0.000176506	4.01305
wgEncodeOpenChromFaireGm12892Pk	6.94	0.000194861	2.67954
USF2_all	6.836	0.000217676	3.70442
Birzele_merged_ChIP_Hs_Treg_FOXP3	6.796	0.000227151	3.56254
wgEncodeBroadHistoneNhlfH3k4me1StdAln	6.628	0.000271709	2.02775
wgEncodeDukeDnaseAoSMC	6.57	0.000289058	3.16111
IRF4_all	6.543	0.000297511	3.94709
wgEncodeBroadHistoneK562H2azStdAln	6.532	0.000301026	2.23181
wgEncodeUwDnaseGM12865	6.531	0.000301347	3.13127
wgEncodeBroadHistoneHsmmtH3k27acStdAln	6.411	0.000342567	1.95801
RCOR1_all	6.308	0.000382459	3.06891
wgEncodeBroadHistoneNhlfH3k27acStdAln	6.273	0.000397055	2.0952
IKZF1_all	6.158	0.000449092	3.65493
wgEncodeUwDnaseAoAF	6.098	0.000478921	3.00771
wgEncodeBroadHistoneHuvecH3k27acStdAln	6.003	0.000530295	1.97164
wgEncodeUwDnaseHCFaa	5.986	0.000540059	3.18713
wgEncodeUWDukeDnaseTh1	5.975	0.000546474	2.71235
Th1.Dnase.UW	5.975	0.000546474	2.71235
wgEncodeBroadHistoneK562H3k27acStdAln	5.952	0.000560135	2.27905
CHD1_all	5.938	0.000568619	3.57649
wgEncodeUwDnaseHFFMyc	5.712	0.000725014	2.98885
MXI1_all	5.7	0.000734441	3.30694
TAF1_all	5.624	0.000797089	3.24072
SIN3A_all	5.583	0.000833101	3.14875
wgEncodeUwDnaseGM06990	5.509	0.000902314	3.24461
ELF1_all	5.418	0.000995455	3.10927
wgEncodeUwDnaseAG10803	5.406	0.00100844	2.9135
SPI1_all	5.372	0.00104618	3.02412
wgEncodeDukeDnasePanIsletD	5.352	0.00106904	2.87874
BCL11A_all	5.302	0.00112843	4.11228
PML_all	5.155	0.00132311	3.1257
NFATC1_all	5.15	0.0013303	3.55899
wgEncodeBroadHistoneNhlfH3k9acStdAln	5.101	0.00140288	2.65202
wgEncodeUwDnaseHNPCEpiC	4.999	0.0015671	2.8706
wgEncodeBroadHistoneHmecH3k9acStdAln	4.996	0.00157222	2.34735
wgEncodeBroadHistoneK562H3k4me2StdAln	4.975	0.00160849	2.18728
wgEncodeBroadHistoneHuvecH3k4me1StdAln	4.97	0.00161726	1.7167
wgEncodeDukeDnaseGM19238	4.864	0.00181482	2.9987
wgEncodeBroadHistoneHsmmH3k4me1StdAln	4.848	0.0018467	1.80956
wgEncodeUwDnaseHMVECLBl	4.84	0.00186285	2.60103
wgEncodeUwDnaseNB4	4.835	0.00187301	2.87871
wgEncodeDukeDnaseStellate	4.797	0.00195214	2.83315
TBL1XR1_all	4.774	0.00200167	3.3787
wgEncodeUwDnaseNHA	4.759	0.00203466	2.73235
wgEncodeUwDnaseHPdLF	4.736	0.00208632	2.80356
wgEncodeDukeDnaseGM12891	4.69	0.00219366	2.75226
ATF1_all	4.659	0.00226914	3.58979
wgEncodeDukeDnaseGM19240	4.623	0.0023601	2.66928
wgEncodeBroadHistoneOsteoblH3k4me2StdAln	4.607	0.00240171	1.87138
wgEncodeUwDnaseHBMEC	4.518	0.00264714	2.6749
wgEncodeUwDnaseHAsp	4.498	0.00270571	2.82204
wgEncodeDukeDnaseTh0	4.432	0.0029085	2.71277
wgEncodeUwDnaseAG09309	4.348	0.00318909	2.70727
wgEncodeUwDnaseHPAF	4.304	0.0033469	2.76021
wgEncodeBroadHistoneNhlfH3k4me2StdAln	4.279	0.00344007	2.0278
wgEncodeUwDnaseHIPEpiC	4.227	0.00364241	2.7503
FOS_all	4.225	0.00365043	2.38612
wgEncodeBroadHistoneHuvecH3k9acStdAln	4.221	0.00366653	2.10944
wgEncodeBroadHistoneHsmmtH3k4me2StdAln	4.205	0.00373163	1.86517
wgEncodeDukeDnaseGM18507	4.175	0.00385687	2.98241
wgEncodeBroadHistoneOsteoblH3k36me3StdAln	4.175	0.00385687	1.39233
wgEncodeDukeDnaseMyometr	4.114	0.0041249	3.00947
wgEncodeBroadHistoneK562H3k4me3StdAln	4.07	0.00432993	2.09308
wgEncodeBroadHistoneHsmmtH3k9acStdAln	4.017	0.00459073	1.89031
wgEncodeUwDnaseCMK	4.012	0.00461615	2.73712
REST_all	3.882	0.00532978	2.67131
wgEncodeDukeDnaseProgFib	3.864	0.00543709	2.53246
wgEncodeBroadHistoneNhlfH3k36me3StdAln	3.813	0.00575328	1.55626
wgEncodeBroadHistoneHsmmH2azStdAln	3.81	0.00577245	2.02324
wgEncodeUwDnaseNHLF	3.759	0.00610855	2.57827
wgEncodeUwDnaseNHDFneo	3.75	0.0061699	2.72743
wgEncodeBroadHistoneK562H3k79me2StdAln	3.746	0.00619737	1.6091
wgEncodeBroadHistoneHepg2H3k9acStdAln	3.743	0.00621805	2.05765
wgEncodeUwDnaseAG04449	3.606	0.00724178	2.74809
wgEncodeUwDnaseRPTEC	3.57	0.00753832	2.70439
wgEncodeUwDnaseCD34Mobilized	3.568	0.00755515	2.62859
wgEncodeUwDnaseCD20	3.552	0.00769121	2.87133
wgEncodeUwDnaseSKMC	3.53	0.0078824	2.58508
TEAD4_all	3.527	0.00790884	2.75039
wgEncodeBroadHistoneNhaH3k27acStdAln	3.518	0.00798873	1.69889
wgEncodeOpenChromFaireK562Pk	3.499	0.00816008	2.33378
wgEncodeBroadHistoneHmecH3k4me1StdAln	3.498	0.00816921	1.50473
wgEncodeBroadHistoneHsmmH3k4me2StdAln	3.486	0.00827949	1.89191
wgEncodeBroadHistoneK562H3k9acStdAln	3.483	0.0083073	1.91277
wgEncodeUwDnaseHVMF	3.47	0.00842891	2.49365
wgEncodeBroadHistoneHmecH3k36me3StdAln	3.447	0.00864855	2.05276
BCL3_all	3.414	0.00897397	2.97171
wgEncodeBroadHistoneNhekH3k36me3StdAln	3.411	0.00900417	1.49863
BHLHE40_all	3.356	0.00957663	3.04513
wgEncodeBroadHistoneNhdfadH3k9acStdAln	3.355	0.00958737	2.14826
wgEncodeBroadHistoneNhdfadH3k4me3StdAln	3.321	0.00996021	2.23075
JUN_all	3.295	0.0102553	2.30168
wgEncodeUwDnaseHRE	3.286	0.0103595	2.51766
wgEncodeUwDnaseNHDFAd	3.284	0.0103829	2.47802
wgEncodeBroadHistoneH1hescH3k4me2StdAln	3.261	0.0106548	1.76936
wgEncodeUwDnaseBJ	3.219	0.0111704	2.59262
wgEncodeUwDnaseHMVECdLyAd	3.192	0.0115154	2.65517
wgEncodeUWDukeDnaseHSMM	3.185	0.0116066	2.36745
wgEncodeUwDnaseHRCEpiC	3.147	0.0121147	2.58509
wgEncodeUwDnaseHCF	3.145	0.0121421	2.65773
wgEncodeUwDnaseHFF	3.124	0.0124334	2.64936
TFAP2C_all	3.085	0.0129935	3.1795
wgEncodeBroadHistoneHuvecH3k4me3StdAln	3.04	0.0136721	2.12714
wgEncodeDukeDnaseCLL	3	0.0143059	2.87422
wgEncodeBroadHistoneHsmmH3k9acStdAln	2.957	0.015021	2.05321
wgEncodeBroadHistoneHsmmH3k27acStdAln	2.955	0.0150552	1.78736
wgEncodeBroadHistoneNhdfadH3k27acStdAln	2.939	0.0153312	1.67055
wgEncodeBroadHistoneHmecH3k4me3StdAln	2.939	0.0153312	2.06036
wgEncodeOpenChromFaireHelas3Ifna4hPk	2.921	0.015648	1.90408
wgEncodeBroadHistoneHepg2H3k79me2StdAln	2.921	0.015648	1.38241
EP300_all	2.917	0.0157193	2.30832
SIN3AK20_all	2.914	0.015773	2.89312
wgEncodeBroadHistoneHsmmH3k4me3StdAln	2.893	0.0161543	2.0666
wgEncodeBroadHistoneNhlfH3k4me3StdAln	2.876	0.0164699	2.14641
wgEncodeBroadHistoneHuvecH3k36me3StdAln	2.828	0.0173958	1.43331
TCF12_all	2.825	0.0174554	2.96884
wgEncodeUwDnaseHMVECdAd	2.811	0.0177364	2.67049
PAX5_all	2.81	0.0177566	2.77948
wgEncodeUwDnaseHMVECLLy	2.803	0.0178991	2.5938
STAT5A_all	2.794	0.0180839	2.92369
wgEncodeUWDukeDnaseGM12878	2.772	0.0185441	2.21931
wgEncodeBroadHistoneHsmmtH3k4me1StdAln	2.767	0.0186504	1.31856
wgEncodeUwDnaseHMF	2.761	0.0187788	2.50338
wgEncodeBroadHistoneNhekH3k4me3StdAln	2.741	0.0192133	1.95171
wgEncodeUwDnaseHCM	2.732	0.0194122	2.5555
wgEncodeBroadHistoneHelas3H3k9acStdAln	2.711	0.0198846	1.70091
wgEncodeBroadHistoneHepg2H2azStdAln	2.673	0.0207699	2.03338
wgEncodeBroadHistoneNhdfadH3k36me3StdAln	2.593	0.0227696	1.44227
wgEncodeOpenChromFaireGm12878Pk	2.565	0.0235157	2.60375
wgEncodeBroadHistoneHelas3H3k79me2StdAln	2.512	0.0249984	1.2511
E2F6_all	2.512	0.0249984	2.73779
FOSL1_all	2.468	0.0263028	3.14985
wgEncodeBroadHistoneHelas3H3k27acStdAln	2.437	0.0272642	1.48839
wgEncodeBroadHistoneNhekH3k9acStdAln	2.426	0.0276141	1.75206
wgEncodeUwDnaseWI38TamoxifenTamoxifen	2.423	0.0277103	2.13765
wgEncodeDukeDnaseFibrobl	2.398	0.0285259	1.71161
wgEncodeUWDukeDnaseHSMMtube	2.389	0.0288256	2.04862
USF1_all	2.377	0.0292303	2.72364
wgEncodeUwDnaseHCPEpiC	2.317	0.0313444	2.38487
wgEncodeBroadHistoneHsmmtH2azStdAln	2.314	0.0314542	1.68443
wgEncodeDukeDnaseUrothelia	2.279	0.0327653	2.34238
wgEncodeOpenChromFaireHuvecPk	2.256	0.0336579	1.96129
wgEncodeBroadHistoneNhdfadH3k4me2StdAln	2.251	0.0338552	1.60505
wgEncodeBroadHistoneNhekH3k4me2StdAln	2.218	0.0351886	1.43527
wgEncodeBroadHistoneHepg2H3k4me3StdAln	2.209	0.0355617	1.75917
wgEncodeUwDnaseJurkat	2.207	0.0356452	2.22539
MAFK_all	2.187	0.0364912	2.38237
wgEncodeUwDnaseAG04450	2.184	0.0366199	2.35234
MEF2A_all	2.183	0.036663	2.72955
wgEncodeBroadHistoneHelas3H3k4me3StdAln	2.168	0.0373145	1.54192
wgEncodeBroadHistoneHsmmtH3k4me3StdAln	2.161	0.0376227	1.80606
BATF_all	2.136	0.0387453	2.87294
GABPA_all	2.106	0.040139	2.5367
FAM48A_all	2.055	0.0426304	4.83947
wgEncodeBroadHistoneGm12878H4k20me1StdAln	2	0.0455003	2.00769
wgEncodeBroadHistoneHsmmtH3k36me3StdAln	1.932	0.0493326	1.12497
wgEncodeUwDnaseHEEpiC	1.926	0.0496867	2.18326
wgEncodeDukeDnaseUrotheliaUT189	1.922	0.0499243	1.86726
JUND_all	1.921	0.0499839	2.08282
wgEncodeBroadHistoneHsmmtH3k79me2StdAln	1.891	0.0518067	1.05304
wgEncodeBroadHistoneNhaH3k36me3StdAln	1.839	0.0551349	1.26701
wgEncodeDukeDnaseHSMMemb	1.837	0.0552674	2.2533
wgEncodeBroadHistoneHuvecH3k4me2StdAln	1.822	0.0562716	1.4974
wgEncodeBroadHistoneGm12878H3k9me3StdAln	1.819	0.0564747	1.39132
TBP_all	1.8	0.0577796	2.49938
wgEncodeBroadHistoneHmecH3k4me2StdAln	1.788	0.0586201	1.42365
wgEncodeBroadHistoneNhekH3k4me1StdAln	1.786	0.0587615	1.15799
wgEncodeOpenChromFaireHelas3Ifng4hPk	1.767	0.0601226	1.55694
wgEncodeBroadHistoneNhekH3k27acStdAln	1.765	0.0602678	1.35176
MAZ_all	1.754	0.0610731	2.24909
wgEncodeUwDnaseHAh	1.748	0.0615172	2.08165
wgEncodeBroadHistoneHsmmH3k36me3StdAln	1.744	0.0618152	1.13326
wgEncodeBroadHistoneNhaH3k4me3StdAln	1.732	0.0627184	1.75334
wgEncodeOpenChromFaireGlioblaPk	1.686	0.0663132	2.04209
SMARCB1_all	1.631	0.0709026	2.94165
wgEncodeBroadHistoneHepg2H3k36me3StdAln	1.6	0.0736383	1.10351
GATA2_all	1.559	0.0774318	2.20204
wgEncodeBroadHistoneHelas3H3k36me3StdAln	1.516	0.0816373	1.12832
wgEncodeBroadHistoneK562H3k36me3StdAln	1.504	0.0828545	1.1944
GATA1_all	1.441	0.0895747	2.44827
wgEncodeBroadHistoneOsteoblH3k9me3StdAln	1.427	0.0911469	1.82807
wgEncodeUwDnaseWI38	1.426	0.0912603	1.96649
wgEncodeOpenChromFaireHtr8Pk	1.395	0.0948542	1.95286
wgEncodeOpenChromFaireAstrocyPk	1.388	0.0956869	2.66164
wgEncodeDukeDnaseFibroP	1.383	0.0962865	1.87786
EGR1_all	1.379	0.0967691	2.42449
wgEncodeDukeDnaseHepatocytes	1.376	0.0971329	1.89978
wgEncodeBroadHistoneK562H3k27me3StdAln	1.365	0.0984793
ESR1_all	1.356	0.0995961	2.68279
ZBTB33_all	1.338	0.101871	2.94454
wgEncodeUwDnaseHMVECdBlAd	1.321	0.104072	2.05595
wgEncodeBroadHistoneH1hescH3k36me3StdAln	1.309	0.105658	1.24471
wgEncodeUwDnaseHMVECdBlNeo	1.273	0.110574	1.98876
wgEncodeUwDnaseSKNMC	1.241	0.115156	2.11179
SMARCC1_all	1.232	0.116482	2.95411
wgEncodeDukeDnaseGliobla	1.21	0.119795	1.87881
wgEncodeBroadHistoneK562H3k9me3StdAln	1.21	0.119795	2.25757
wgEncodeDukeDnaseChorion	1.187	0.123371	1.74681
wgEncodeUwDnaseHRGEC	1.183	0.124004	2.14822
wgEncodeBroadHistoneOsteoblH2azStdAln	1.152	0.129041	1.25376
wgEncodeBroadHistoneNhekH3k9me1StdAln	1.145	0.13021	1.8871
ATF3_all	1.139	0.131221	2.73262
HDAC1_all	1.132	0.132412	3.05787
PRDM1_all	1.102	0.137653	3.38596
wgEncodeDukeDnaseMelano	1.097	0.138549	1.79193
wgEncodeUWDukeDnaseNHEK	1.079	0.141829	1.82652
wgEncodeBroadHistoneHepg2H3k4me2StdAln	1.03	0.15121	1.17455
wgEncodeBroadHistoneHsmmtH4k20me1StdAln	1.021	0.153008	1.06109
wgEncodeBroadHistoneHsmmH3k79me2StdAln	1.001	0.157092	0.868216
wgEncodeUwDnaseHPF	0.994	0.15855	1.74291
wgEncodeBroadHistoneHuvecH3k27me3StdAln	0.962	0.165416	0.775552
wgEncodeBroadHistoneHelas3H3k27me3StdAln	0.956	0.166741
ZBTB7A_all	0.946	0.168977	2.04279
KAP1_all	0.921	0.174717	1.9364
NANOG_all	0.853	0.191505	3.54191
wgEncodeOpenChromFaireNhekPk	0.842	0.194394	1.46294
wgEncodeBroadHistoneHelas3H3k4me2StdAln	0.834	0.196527	1.12029
wgEncodeDukeDnaseHTR8svn	0.831	0.197334	1.6564
wgEncodeBroadHistoneHepg2H3k27acStdAln	0.825	0.198959	1.27337
KDM5B_all	0.818	0.200875	2.29164
ZNF217_all	0.782	0.211081	2.81331
wgEncodeBroadHistoneHmecH3k27acStdAln	0.782	0.211081	1.11462
CHD2_all	0.781	0.211373	2.40507
HDAC2_all	0.748	0.221288	2.22746
FOXA2_all	0.744	0.222527	1.74184
wgEncodeBroadHistoneNhekH3k27me3StdAln	0.742	0.22315
FOXP2_all	0.721	0.229816	1.94243
RAD21_all	0.683	0.2425	1.46618
TFAP2A_all	0.656	0.252033	2.4544
wgEncodeUWDukeDnaseK562	0.635	0.259767	1.83773
HMGN3_all	0.628	0.26241	2.20938
SMARCC2_all	0.616	0.267018	3.24029
PHF8_all	0.615	0.267407	1.98556
wgEncodeBroadHistoneHepg2H3k27me3StdAln	0.59	0.277356
FOXA1_all	0.588	0.278172	1.44104
wgEncodeBroadHistoneH1hescH3k4me1StdAln	0.579	0.281881	0.902173
wgEncodeBroadHistoneH1hescH3k27me3StdAln	0.55	0.294266	1.02678
wgEncodeBroadHistoneGm12878H3k27me3StdAln	0.533	0.301851	1.136
UBTF_all	0.523	0.30643	2.72707
wgEncodeUwDnaseHMVECdLyNeo	0.515	0.310159	1.57592
wgEncodeDukeDnaseMedullo	0.511	0.312045
wgEncodeBroadHistoneHsmmH3k9me3StdAln	0.497	0.318767	1.23506
wgEncodeBroadHistoneHmecH4k20me1StdAln	0.472	0.331251	1.40354
wgEncodeBroadHistoneH1hescH3k4me3StdAln	0.45	0.342782	1.15039
wgEncodeBroadHistoneNhdfadH3k27me3StdAln	0.438	0.3493	0.636241
wgEncodeUwDnasePrEC	0.432	0.352622	1.7446
CCNT2_all	0.421	0.358825	1.92438
wgEncodeOpenChromFairePanisletsPk	0.415	0.362273	1.81535
wgEncodeOpenChromFaireK562NabutPk	0.411	0.364596	1.26909
wgEncodeBroadHistoneHelas3H4k20me1StdAln	0.4	0.371093	1.09029
ELK4_all	0.395	0.3741	2.68691
ZNF263_all	0.393	0.375312	1.80921
wgEncodeDukeDnaseHeLaS3IFNa4h	0.392	0.375921
wgEncodeDukeDnaseOsteobl	0.389	0.377754	0.938106
wgEncodeUWDukeDnaseA549	0.384	0.380836	1.54228
wgEncodeUWDukeDnaseMCF7	0.383	0.381457
wgEncodeUwDnaseCaco2	0.375	0.386476	1.19979
ESRRA_all	0.349	0.403457	4.02384
wgEncodeBroadHistoneHuvecH4k20me1StdAln	0.338	0.410968	1.17491
wgEncodeOpenChromFaireH1hescPk	0.337	0.41166	1.65934
wgEncodeDukeDnaseGM12892	0.328	0.417976	1.33312
wgEncodeDukeDnaseHuh7.5	0.327	0.418686
wgEncodeUwDnaseBE2C	0.324	0.420829
wgEncodeUwDnaseHRPEpiC	0.317	0.425892	1.01524
wgEncodeOpenChromFaireHepg2Pk	0.298	0.440108
wgEncodeUwDnaseWERIRb1	0.292	0.444749
wgEncodeBroadHistoneH1hescH4k20me1StdAln	0.286	0.449465	0.804042
wgEncodeUWDukeDnaseLNCaP	0.262	0.46914	1.03165
wgEncodeDukeDnase8988T	0.261	0.46999	1.42116
wgEncodeBroadHistoneNhlfH4k20me1StdAln	0.251	0.478623	1.84375
E2F4_all	0.224	0.503286
wgEncodeDukeDnasepHTE	0.21	0.516937
wgEncodeUwDnaseAG09319	0.205	0.52197
wgEncodeUwDnaseSKNSHRA	0.204	0.522986
IRF1_all	0.195	0.532299
wgEncodeDukeDnaseHuh7	0.193	0.53441
TCF7L2_all	0.192	0.53547
SP1_all	0.19	0.537603
ARID3A_all	0.19	0.537603
wgEncodeUwDnaseHCT116	0.189	0.538676
NFKB_binding_regions	0.187	0.540832
wgEncodeDukeDnaseHPDE6E6E7	0.182	0.546293
wgEncodeOpenChromFaireK562OhureaPk	0.175	0.554113
YY1_all	0.167	0.563313
wgEncodeUWDukeDnaseHUVEC	0.166	0.564484
wgEncodeUwDnaseH7hESC	0.164	0.566839
wgEncodeDukeDnaseIshikawaEstradiol	0.163	0.568024
wgEncodeUwDnaseHGF	0.159	0.572812
wgEncodeBroadHistoneNhekH4k20me1StdAln	0.159	0.572812
wgEncodeBroadHistoneHmecH3k27me3StdAln	0.154	0.57891
wgEncodeDukeDnasePanIslets	0.153	0.580145
SUZ12_all	0.146	0.588942
ZKSCAN1_all	0.144	0.591505
wgEncodeUwDnaseSAEC	0.143	0.592795
NR3C1_all	0.14	0.596701
PPARGC1A_all	0.139	0.598015
wgEncodeUwDnasePANC1	0.138	0.599335
ELK1_all	0.137	0.600661
wgEncodeDukeDnaseIshikawaTamoxifen	0.134	0.604677
TRIM28_all	0.133	0.606028
wgEncodeBroadHistoneH1hescH3k27acStdAln	0.132	0.607385
EZH2_all	0.13	0.61012
wgEncodeDukeDnaseT47D	0.127	0.614273
wgEncodeDukeDnaseRWPE1	0.126	0.61567
TAF7_all	0.123	0.619906
HDAC8_all	0.119	0.625654
BACH1_all	0.117	0.628574
wgEncodeUWDukeDnaseHMEC	0.111	0.63752
wgEncodeBroadHistoneH1hescH3k9acStdAln	0.111	0.63752
Hawkins_TableS2a_Th1_enhancers	0.111	0.63752
NFYA_all	0.103	0.649921
NR2F2_all	0.098	0.657969
wgEncodeBroadHistoneK562H4k20me1StdAln	0.097	0.659608
wgEncodeUWDukeDnaseHepG2	0.095	0.662917
CBX3_all	0.095	0.662917
wgEncodeOpenChromFaireA549Pk	0.093	0.666267
wgEncodeDukeDnaseMCF7Hypoxia	0.09	0.671373
wgEncodeUwDnaseHMVECdNeo	0.088	0.674834
wgEncodeUwDnaseNT2D1	0.085	0.680112
ZEB1_all	0.081	0.687322
E2F1_all	0.081	0.687322
wgEncodeUWDukeDnaseH1hESC	0.079	0.691005
wgEncodeUwDnaseHConF	0.079	0.691005
wgEncodeOpenChromFaireUrotsaUt189Pk	0.077	0.694742
wgEncodeOpenChromFaireUrotsaPk	0.073	0.702388
wgEncodeOpenChromFaireHelas3Pk	0.068	0.71229
HNF4A_all	0.067	0.71432
RPC155_all	0.065	0.718432
BRCA1_all	0.065	0.718432
TAL1_all	0.063	0.722616
SMC3_all	0.062	0.724736
HNF4G_all	0.06	0.729034
FOSL2_all	0.06	0.729034
ZNF143_all	0.058	0.733414
SP4_all	0.058	0.733414
GTF3C2_all	0.057	0.735635
NRF1_all	0.055	0.740144
CTBP2_all	0.055	0.740144
wgEncodeOpenChromFaireMedulloPk	0.053	0.744745
SMARCA4_all	0.052	0.747081
SAP30_all	0.047	0.759152
wgEncodeBroadHistoneHsmmH4k20me1StdAln	0.043	0.769325
NR2C2_all	0.042	0.771948
STAT2_all	0.04	0.777297
wgEncodeBroadHistoneNhaH3k27me3StdAln	0.039	0.780026
wgEncodeDukeDnaseH9ES	0.038	0.782793
ZNF274_all	0.037	0.785599
THAP1_all	0.035	0.791337
wgEncodeUWDukeDnaseHeLaS3	0.034	0.794271
SIRT6_all	0.034	0.794271
CREB1_all	0.034	0.794271
IRF3_all	0.033	0.797252
PBX3_all	0.03	0.806496
GRp20_all	0.03	0.806496
NFE2_all	0.028	0.812934
ETS1_all	0.028	0.812934
BRF2_all	0.028	0.812934
CTCFL_all	0.027	0.816244
HDAC6_all	0.024	0.826581
HSF1_all	0.023	0.830176
POU5F1_all	0.022	0.833854
NFYB_all	0.022	0.833854
wgEncodeUwDnaseHPAEC	0.018	0.849515
RFX5_all	0.018	0.849515
POLR3G_all	0.018	0.849515
KDM5A_all	0.018	0.849515
wgEncodeBroadHistoneNhlfH3k27me3StdAln	0.017	0.853707
wgEncodeBroadHistoneHsmmH3k27me3StdAln	0.015	0.86249
GTF2F1_all	0.015	0.86249
BDP1_all	0.015	0.86249
CTCF_all	0.013	0.8719
wgEncodeBroadHistoneHepg2H4k20me1StdAln	0.012	0.876885
SREBP1_all	0.011	0.882087
SP2_all	0.011	0.882087
BRF1_all	0.011	0.882087
ZZZ3_all	0.006	0.912771
RDBP_all	0.005	0.920344
TCF3_all	0.004	0.92873
STAT1_all	0.004	0.92873
JUNB_all	0.004	0.92873
GATA3_all	0.003	0.938258
SETDB1_all	0.002	0.949571
MAFF_all	0.002	0.949571
SIX5_all	0	1
RXRA_all	0	1
RBBP5_all	0	1
MYBL2_all	0	1
MBD4_all	0	1
GTF2B_all	0	1

## Sheet: UC
Dataset	llike.ratio	p value	Odds Ratio
BCL11A_all	11.437	1.72976e-06	4.87266
FOXM1_all	10.485	4.66532e-06	4.14389
wgEncodeUwDnaseMonocytesCD14RO01746	9.732	1.02514e-05	3.72011
wgEncodeDukeDnaseGM19239	8.591	3.39639e-05	3.40869
EBF1_all	8.316	4.53789e-05	3.624
NFIC_all	8.011	6.26107e-05	3.4087
T-bet_Th1_10-7-peaks	7.329	0.000128886	3.78349
GATA3_Th1	6.807	0.000224505	4.23822
wgEncodeBroadHistoneGm12878H3k4me1StdAln	6.732	0.000243185	1.9295
wgEncodeBroadHistoneK562H3k4me1StdAln	6.644	0.00026711	1.82943
MYC_all	6.62	0.000274038	2.89002
BATF_all	6.538	0.000299103	4.02941
GATA3_Th2	6.501	0.000311158	4.23549
wgEncodeUwDnaseCD34Mobilized	6.289	0.000390314	3.19696
wgEncodeOpenChromFaireGm19239Pk	5.972	0.000548236	2.7005
wgEncodeUwDnaseNB4	5.889	0.000599348	3.39412
MTA3_all	5.879	0.000605823	3.79524
RELA_all	5.764	0.000685557	3.36334
IKZF1_all	5.545	0.000867945	4.20635
SPI1_all	5.521	0.000890707	3.28519
RUNX3_all	5.431	0.000981576	3.40515
IRF4_all	5.43	0.000982637	4.13704
POLR2A_all	5.321	0.00110548	2.08051
wgEncodeDukeDnaseStellate	5.313	0.00111509	3.03211
ATF2_all	5.215	0.00123985	3.41282
wgEncodeUwDnaseHRCEpiC	5.078	0.00143832	2.95018
wgEncodeBroadHistoneHepg2H3k9acStdAln	4.96	0.00163492	2.07563
wgEncodeUwDnaseHBMEC	4.925	0.00169832	3.09186
Birzele_merged_ChIP_Hs_Treg_FOXP3	4.842	0.0018588	3.90532
wgEncodeUwDnaseHFFMyc	4.829	0.00188529	3.00601
wgEncodeUwDnaseHPdLF	4.764	0.00202361	2.98687
wgEncodeOpenChromFaireGm18507Pk	4.715	0.00213464	2.68609
STAT5A_all	4.695	0.00218172	3.03685
wgEncodeUwDnaseGM06990	4.616	0.00237822	3.25911
wgEncodeBroadHistoneHsmmtH3k27acStdAln	4.586	0.00245746	1.88508
wgEncodeUwDnaseHL60	4.521	0.00263847	2.91634
wgEncodeUwDnaseNHDFneo	4.471	0.00278687	2.82346
MEF2C_all	4.37	0.00311305	4.25525
wgEncodeUwDnaseHAsp	4.366	0.00312673	2.96605
wgEncodeUwDnaseHMVECLBl	4.319	0.00329223	2.84945
NFATC1_all	4.237	0.00360258	3.72033
wgEncodeUwDnaseHNPCEpiC	4.183	0.00382306	2.9022
wgEncodeBroadHistoneHepg2H3k27acStdAln	4.143	0.00399519	1.9311
POU2F2_all	4.126	0.00407071	3.41166
wgEncodeUwDnaseSKMC	4.096	0.00420755	2.8309
BCL3_all	4.07	0.00432993	3.17203
wgEncodeUwDnaseHVMF	4.01	0.00462636	2.89883
STAT3_all	3.99	0.00472969	3.08483
wgEncodeUwDnaseHFF	3.934	0.00503173	2.68197
wgEncodeOpenChromFaireGm12892Pk	3.855	0.00549158	2.49556
USF2_all	3.73	0.0063085	3.40795
ELF1_all	3.707	0.00647183	2.98571
JUND_all	3.596	0.00732293	2.58231
wgEncodeDukeDnaseCLL	3.566	0.00757202	2.96079
JUN_all	3.565	0.00758047	2.54732
wgEncodeDukeDnaseGM19238	3.559	0.00763138	2.9222
wgEncodeUwDnaseNHA	3.528	0.00790002	2.80826
wgEncodeUwDnaseNHLF	3.527	0.00790884	2.83697
wgEncodeUwDnaseGM12865	3.471	0.00841949	2.83589
RCOR1_all	3.42	0.00891388	2.6588
BHLHE40_all	3.321	0.00996021	2.77088
MAX_all	3.305	0.0101408	2.50273
wgEncodeDukeDnaseProgFib	3.301	0.0101864	2.6626
wgEncodeBroadHistoneHsmmtH3k4me1StdAln	3.274	0.0105002	1.67507
TBL1XR1_all	3.248	0.0108117	3.05708
MAFK_all	3.177	0.0117117	2.64549
wgEncodeUwDnaseHRE	3.14	0.0122108	2.65591
wgEncodeBroadHistoneK562H3k27acStdAln	3.12	0.0124896	1.78033
wgEncodeUwDnaseCMK	3.083	0.0130229	2.57895
wgEncodeBroadHistoneK562H3k27me3StdAln	3.064	0.0133057	1.6089
ATF1_all	2.927	0.0155417	3.22866
USF1_all	2.885	0.016302	2.92581
wgEncodeOpenChromFaireGm12878Pk	2.881	0.0163764	2.94118
wgEncodeUwDnaseHAc	2.876	0.0164699	2.61907
wgEncodeBroadHistoneGm12878H3k4me2StdAln	2.829	0.0173759	1.61598
wgEncodeUwDnaseHPF	2.827	0.0174156	2.56271
wgEncodeOpenChromFaireHtr8Pk	2.669	0.0208654	2.07639
wgEncodeUWDukeDnaseHepG2	2.66	0.021082	2.14008
wgEncodeDukeDnasePanIsletD	2.625	0.0219468	2.5752
wgEncodeUwDnaseHAEpiC	2.558	0.0237062	2.59022
wgEncodeUwDnaseCaco2	2.558	0.0237062	2.05174
MEF2A_all	2.508	0.0251141	2.94788
wgEncodeDukeDnaseGM18507	2.507	0.0251431	2.69894
wgEncodeUwDnaseGM12864	2.47	0.026242	2.49979
wgEncodeUwDnaseRPTEC	2.458	0.0266091	2.46104
FOS_all	2.405	0.028295	2.18765
wgEncodeBroadHistoneHepg2H3k4me2StdAln	2.393	0.028692	1.41402
wgEncodeDukeDnaseUrothelia	2.389	0.0288256	2.53699
wgEncodeDukeDnaseOsteobl	2.383	0.0290272	2.02029
BCLAF1_all	2.382	0.0290609	2.90154
wgEncodeOpenChromFaireGm12891Pk	2.316	0.031381	2.0681
wgEncodeUWDukeDnaseHSMM	2.264	0.0333446	2.10466
wgEncodeUwDnaseTh2	2.245	0.0340937	2.6743
wgEncodeUwDnaseBJ	2.206	0.035687	2.48865
wgEncodeDukeDnaseMelano	2.192	0.0362778	2.30743
wgEncodeUWDukeDnaseHSMMtube	2.18	0.0367923	2.18887
Th2_H3K27ac_active_enhancers	2.157	0.0378	1.49467
wgEncodeDukeDnaseGM12891	2.152	0.0380228	2.39332
wgEncodeUwDnaseHCPEpiC	2.111	0.0399031	2.18903
FOXA2_all	2.084	0.0411944	2.60194
wgEncodeBroadHistoneOsteoblH3k4me1StdAln	2.078	0.0414873	1.24169
wgEncodeBroadHistoneGm12878H3k27acStdAln	2.031	0.0438585	1.50058
wgEncodeBroadHistoneNhlfH3k4me1StdAln	2.024	0.0442237	1.4492
wgEncodeUwDnaseHRGEC	1.981	0.0465384	2.53575
FOSL1_all	1.98	0.0465937	2.95118
PAX5_all	1.949	0.0483436	2.47272
wgEncodeUwDnaseHCFaa	1.94	0.0488646	2.39239
wgEncodeUWDukeDnaseGM12878	1.931	0.0493914	2.20111
CEBPB_all	1.916	0.0502829	2.05277
wgEncodeBroadHistoneNhlfH3k27acStdAln	1.876	0.0527444	1.38394
wgEncodeDukeDnaseTh0	1.858	0.0538933	2.20245
wgEncodeUWDukeDnaseTh1	1.838	0.0552011	2.04148
Th1.Dnase.UW	1.838	0.0552011	2.04148
EP300_all	1.828	0.0558676	1.91061
wgEncodeDukeDnaseHTR8svn	1.812	0.0569518	2.40825
wgEncodeBroadHistoneHsmmH3k4me1StdAln	1.788	0.0586201	1.33285
FOXA1_all	1.771	0.0598333	2.06442
MAZ_all	1.768	0.0600501	2.12784
REST_all	1.76	0.0606324	2.22716
E2F6_all	1.741	0.0620397	2.35186
PML_all	1.725	0.0632518	2.34671
ZBTB7A_all	1.71	0.064411	2.46983
wgEncodeBroadHistoneHelas3H3k27acStdAln	1.705	0.0648024	1.32224
SP1_all	1.667	0.0678616	2.74277
wgEncodeUwDnaseAoAF	1.666	0.0679442	2.16055
wgEncodeDukeDnaseGM19240	1.652	0.0691114	2.0731
wgEncodeBroadHistoneK562H2azStdAln	1.649	0.0693643	1.3232
wgEncodeBroadHistoneK562H3k4me2StdAln	1.644	0.069788	1.32369
wgEncodeUwDnaseHAh	1.547	0.0785814	2.17686
wgEncodeUWDukeDnaseNHEK	1.534	0.0798477	1.8906
wgEncodeUwDnaseHPAF	1.488	0.0845079	2.07071
wgEncodeUwDnaseHIPEpiC	1.473	0.0860904	2.04429
wgEncodeBroadHistoneHsmmH3k36me3StdAln	1.458	0.087705
Th1_H3K27ac_active_enhancers	1.458	0.087705	1.26331
wgEncodeBroadHistoneOsteoblH3k36me3StdAln	1.443	0.0893525
wgEncodeUwDnaseAG09319	1.441	0.0895747	2.52606
wgEncodeUwDnaseAG10803	1.428	0.0910336	1.92407
wgEncodeBroadHistoneHelas3H3k36me3StdAln	1.396	0.0947359
wgEncodeUwDnaseHCM	1.347	0.100727	2.00001
wgEncodeBroadHistoneHsmmtH3k4me2StdAln	1.311	0.105392	1.25089
wgEncodeBroadHistoneNhaH3k4me1StdAln	1.305	0.106192	1.04302
wgEncodeBroadHistoneNhlfH3k4me2StdAln	1.285	0.108908	1.26523
wgEncodeOpenChromFaireK562NabutPk	1.271	0.110854	2.0603
WRNIP1_all	1.258	0.112696	3.27178
FOSL2_all	1.257	0.112839	2.57295
wgEncodeBroadHistoneHuvecH3k4me1StdAln	1.203	0.120871	1.01269
wgEncodeBroadHistoneHepg2H3k4me3StdAln	1.172	0.125766	1.35942
wgEncodeDukeDnaseRWPE1	1.158	0.128049	1.87935
wgEncodeUwDnaseNHDFAd	1.154	0.12871	2.04966
wgEncodeUwDnaseHRPEpiC	1.151	0.129208	1.8114
MXI1_all	1.149	0.129541	2.6018
SUZ12_all	1.132	0.132412	2.70401
wgEncodeUWDukeDnaseA549	1.124	0.133787	1.77732
wgEncodeOpenChromFaireGlioblaPk	1.109	0.13641	1.89747
wgEncodeDukeDnaseHSMMemb	1.108	0.136587	1.8598
wgEncodeOpenChromFaireK562Pk	1.103	0.137475	1.73207
CHD1_all	1.084	0.140909	2.80683
wgEncodeBroadHistoneHsmmH3k27acStdAln	1.055	0.146339	1.21153
TFAP2C_all	1.054	0.146531	1.91773
wgEncodeUwDnaseHCF	1.047	0.147878	1.74957
wgEncodeBroadHistoneHmecH3k27me3StdAln	1.02	0.15321	1.50891
wgEncodeBroadHistoneNhdfadH3k27acStdAln	1.001	0.157092	1.22196
TCF12_all	1	0.157299	2.48764
wgEncodeUwDnaseAG04449	0.983	0.160873	1.67358
wgEncodeDukeDnaseAoSMC	0.942	0.16988	1.73157
wgEncodeUwDnaseJurkat	0.934	0.171704	1.71116
RXRA_all	0.927	0.173319	2.96499
wgEncodeBroadHistoneHsmmH3k9me3StdAln	0.918	0.17542	2.45381
wgEncodeUWDukeDnaseHMEC	0.885	0.183382	1.48154
wgEncodeBroadHistoneOsteoblH3k4me2StdAln	0.883	0.183878	0.967652
wgEncodeBroadHistoneHsmmtH3k36me3StdAln	0.883	0.183878
wgEncodeBroadHistoneHuvecH3k36me3StdAln	0.857	0.190467
wgEncodeUwDnaseAG04450	0.854	0.191245	1.61092
MAFF_all	0.845	0.193601	2.27723
wgEncodeBroadHistoneNhaH3k36me3StdAln	0.841	0.194659
wgEncodeUwDnaseHMF	0.797	0.206756	1.53272
wgEncodeBroadHistoneHmecH3k9acStdAln	0.77	0.214618	1.2405
wgEncodeBroadHistoneHmecH3k4me1StdAln	0.767	0.215513	0.845554
wgEncodeBroadHistoneHelas3H3k79me2StdAln	0.758	0.218226
TEAD4_all	0.731	0.226612	1.50284
CTCF_all	0.727	0.227887
SRF_all	0.716	0.231438	2.85497
wgEncodeBroadHistoneGm12878H3k79me2StdAln	0.715	0.231764	0.904993
wgEncodeUwDnaseNT2D1	0.708	0.234063	1.4192
wgEncodeDukeDnaseT47D	0.698	0.237394	1.90936
STAT1_all	0.677	0.24458	2.24319
PBX3_all	0.666	0.24845	3.48482
wgEncodeBroadHistoneHuvecH3k27me3StdAln	0.659	0.250951	0.688196
wgEncodeBroadHistoneHmecH3k4me2StdAln	0.659	0.250951	0.875447
wgEncodeBroadHistoneHuvecH3k4me3StdAln	0.654	0.252757
wgEncodeBroadHistoneGm12878H2azStdAln	0.653	0.25312	1.2027
wgEncodeDukeDnaseGliobla	0.651	0.253848	1.40985
wgEncodeBroadHistoneHuvecH3k27acStdAln	0.651	0.253848	0.96649
wgEncodeBroadHistoneHelas3H3k27me3StdAln	0.643	0.256786
wgEncodeUwDnaseWI38TamoxifenTamoxifen	0.62	0.265471	1.32929
wgEncodeBroadHistoneHsmmH3k27me3StdAln	0.613	0.268186	1.03452
CEBPD_all	0.612	0.268577	2.86957
wgEncodeBroadHistoneNhdfadH3k4me2StdAln	0.589	0.277764	0.97561
HDAC2_all	0.587	0.278581	2.22629
wgEncodeUWDukeDnaseLNCaP	0.586	0.278991	1.46227
wgEncodeBroadHistoneH1hescH3k4me3StdAln	0.572	0.284809
wgEncodeUwDnaseHMVECdLyNeo	0.561	0.289488	2.03357
wgEncodeBroadHistoneOsteoblH2azStdAln	0.556	0.291648	0.997936
wgEncodeBroadHistoneHsmmH4k20me1StdAln	0.542	0.297804
HNF4G_all	0.542	0.297804	2.77777
wgEncodeUwDnaseHMVECdBlNeo	0.537	0.300044	1.77505
wgEncodeBroadHistoneNhlfH3k4me3StdAln	0.535	0.300945
wgEncodeUwDnaseWERIRb1	0.533	0.301851
wgEncodeUwDnaseAG09309	0.524	0.305968	1.22062
SIN3AK20_all	0.518	0.308754	2.09308
wgEncodeUwDnaseCD20	0.509	0.312994	2.07733
wgEncodeBroadHistoneOsteoblH3k27acStdAln	0.508	0.31347	0.741659
wgEncodeDukeDnaseFibroP	0.493	0.320722	1.18734
wgEncodeBroadHistoneNhekH3k4me1StdAln	0.488	0.323188	0.675647
wgEncodeBroadHistoneGm12878H4k20me1StdAln	0.479	0.327691
MBD4_all	0.468	0.333309	2.46661
wgEncodeBroadHistoneNhlfH3k27me3StdAln	0.454	0.340646	0.725091
wgEncodeUwDnaseHGF	0.446	0.344936	1.93318
wgEncodeBroadHistoneNhaH3k27me3StdAln	0.436	0.350402	0.734965
NR3C1_all	0.435	0.350955	2.08809
wgEncodeUwDnaseHMVECdBlAd	0.425	0.356552	1.88913
wgEncodeBroadHistoneH1hescH3k9acStdAln	0.416	0.361695
wgEncodeOpenChromFaireHelas3Ifng4hPk	0.41	0.36518
TAF7_all	0.408	0.366352	2.01701
ELK1_all	0.404	0.368712	2.59865
wgEncodeBroadHistoneNhdfadH3k4me3StdAln	0.387	0.378982
wgEncodeBroadHistoneGm12878H3k9acStdAln	0.383	0.381457	0.980409
RAD21_all	0.377	0.385213	1.00422
wgEncodeOpenChromFaireUrotsaUt189Pk	0.375	0.386476
wgEncodeDukeDnaseUrotheliaUT189	0.375	0.386476	1.02617
wgEncodeBroadHistoneHsmmtH3k4me3StdAln	0.371	0.389021
wgEncodeBroadHistoneHelas3H4k20me1StdAln	0.371	0.389021	1.05729
wgEncodeBroadHistoneHelas3H3k4me2StdAln	0.366	0.392236
wgEncodeUWDukeDnaseHUVEC	0.346	0.405485	1.47758
wgEncodeBroadHistoneHmecH3k36me3StdAln	0.336	0.412355
wgEncodeBroadHistoneHuvecH4k20me1StdAln	0.334	0.41375
SIN3A_all	0.334	0.41375	1.77769
wgEncodeBroadHistoneK562H3k9me3StdAln	0.306	0.434036
NFKB_binding_regions	0.305	0.434788	1.85912
wgEncodeBroadHistoneHepg2H2azStdAln	0.301	0.437816	0.872321
EZH2_all	0.299	0.439342	1.01108
wgEncodeBroadHistoneHsmmtH2azStdAln	0.295	0.442419	0.953784
wgEncodeBroadHistoneHsmmH3k9acStdAln	0.292	0.444749	0.794532
wgEncodeBroadHistoneK562H3k4me3StdAln	0.287	0.448674	0.789597
wgEncodeUWDukeDnaseHeLaS3	0.286	0.449465
wgEncodeBroadHistoneHsmmH3k4me3StdAln	0.28	0.45426	0.800047
wgEncodeBroadHistoneHsmmtH3k9acStdAln	0.273	0.459957	0.706058
wgEncodeBroadHistoneHmecH4k20me1StdAln	0.261	0.46999
wgEncodeBroadHistoneHmecH3k27acStdAln	0.261	0.46999	0.673686
wgEncodeDukeDnaseHuh7	0.255	0.475139	1.88962
wgEncodeBroadHistoneNhekH3k9acStdAln	0.251	0.478623	0.704487
wgEncodeBroadHistoneHmecH3k4me3StdAln	0.251	0.478623	0.794442
wgEncodeBroadHistoneH1hescH4k20me1StdAln	0.247	0.482148	0.798209
wgEncodeDukeDnaseFibrobl	0.242	0.486616	0.757402
wgEncodeBroadHistoneNhlfH3k9acStdAln	0.24	0.488422	1.11517
wgEncodeUwDnaseH7hESC	0.235	0.492987
CBX3_all	0.228	0.499499
wgEncodeOpenChromFaireUrotsaPk	0.224	0.503286
wgEncodeOpenChromFaireMedulloPk	0.224	0.503286
wgEncodeUWDukeDnaseK562	0.222	0.505198
ZNF143_all	0.22	0.507122
wgEncodeBroadHistoneK562H3k9acStdAln	0.22	0.507122
wgEncodeUwDnaseHMVECdLyAd	0.219	0.508089
wgEncodeBroadHistoneNhekH4k20me1StdAln	0.217	0.510033
HDAC1_all	0.215	0.511989
SETDB1_all	0.205	0.52197
wgEncodeDukeDnaseChorion	0.199	0.528124
wgEncodeBroadHistoneNhekH3k27acStdAln	0.198	0.529162
wgEncodeBroadHistoneHelas3H3k9acStdAln	0.191	0.536535
Hawkins_TableS2a_Th1_enhancers	0.19	0.537603
wgEncodeUwDnaseSKNSHRA	0.188	0.539752
wgEncodeOpenChromFaireNhbePk	0.187	0.540832
GATA1_all	0.179	0.549619
wgEncodeUwDnaseSAEC	0.177	0.551858
E2F1_all	0.173	0.556386
wgEncodeDukeDnasePanIslets	0.17	0.559829
wgEncodeBroadHistoneHuvecH3k4me2StdAln	0.169	0.560986
TCF7L2_all	0.168	0.562147
RBBP5_all	0.168	0.562147
GATA2_all	0.168	0.562147
wgEncodeUwDnaseHMVECLLy	0.161	0.570408
wgEncodeDukeDnaseLNCaPAndrogen	0.161	0.570408
NR2F2_all	0.159	0.572812
wgEncodeUwDnasePANC1	0.154	0.57891
wgEncodeDukeDnasepHTE	0.154	0.57891
wgEncodeOpenChromFairePanisletsPk	0.149	0.585139
wgEncodeUwDnaseHConF	0.147	0.587669
wgEncodeDukeDnaseHeLaS3IFNa4h	0.147	0.587669
HNF4A_all	0.144	0.591505
wgEncodeDukeDnaseMCF7Hypoxia	0.142	0.594091
TRIM28_all	0.142	0.594091
wgEncodeOpenChromFaireHuvecPk	0.14	0.596701
wgEncodeDukeDnaseHepatocytes	0.14	0.596701
GTF2F1_all	0.14	0.596701
FOXP2_all	0.14	0.596701
wgEncodeBroadHistoneHepg2H4k20me1StdAln	0.139	0.598015
GABPA_all	0.139	0.598015
E2F4_all	0.138	0.599335
PHF8_all	0.137	0.600661
wgEncodeOpenChromFaireK562OhureaPk	0.136	0.601993
CHD2_all	0.136	0.601993
ETS1_all	0.134	0.604677
wgEncodeDukeDnaseiPS	0.13	0.61012
GATA3_all	0.13	0.61012
wgEncodeDukeDnaseMedullo	0.127	0.614273
wgEncodeBroadHistoneGm12878H3k9me3StdAln	0.126	0.61567
wgEncodeUwDnaseHPAEC	0.124	0.618487
wgEncodeBroadHistoneNhlfH4k20me1StdAln	0.122	0.621332
wgEncodeBroadHistoneHsmmtH4k20me1StdAln	0.122	0.621332
wgEncodeBroadHistoneNhdfadH3k27me3StdAln	0.121	0.622765
ZBTB33_all	0.119	0.625654
wgEncodeBroadHistoneHepg2H3k36me3StdAln	0.115	0.631524
BACH1_all	0.115	0.631524
JUNB_all	0.109	0.640568
wgEncodeOpenChromFaireH1hescPk	0.107	0.64365
ATF3_all	0.107	0.64365
wgEncodeOpenChromFaireA549Pk	0.106	0.645204
wgEncodeUwDnaseHCT116	0.103	0.649921
wgEncodeBroadHistoneHelas3H3k4me3StdAln	0.098	0.657969
wgEncodeBroadHistoneHsmmH3k79me2StdAln	0.097	0.659608
wgEncodeBroadHistoneH1hescH3k27acStdAln	0.097	0.659608
TFAP2A_all	0.093	0.666267
CTBP2_all	0.091	0.66966
wgEncodeOpenChromFaireHelas3Pk	0.09	0.671373
SMARCB1_all	0.09	0.671373
wgEncodeUWDukeDnaseH1hESC	0.087	0.676581
wgEncodeDukeDnaseH9ES	0.085	0.680112
SP4_all	0.083	0.683691
wgEncodeDukeDnaseIshikawaTamoxifen	0.077	0.694742
wgEncodeUwDnaseSKNMC	0.076	0.696631
SIX5_all	0.074	0.700454
wgEncodeBroadHistoneHsmmtH3k79me2StdAln	0.073	0.702388
wgEncodeBroadHistoneOsteoblH3k9me3StdAln	0.072	0.704336
TAL1_all	0.071	0.706301
wgEncodeDukeDnaseIshikawaEstradiol	0.07	0.708281
SMARCA4_all	0.07	0.708281
wgEncodeBroadHistoneHepg2H3k79me2StdAln	0.069	0.710277
wgEncodeOpenChromFaireHepg2Pk	0.067	0.71432
wgEncodeBroadHistoneHsmmH3k4me2StdAln	0.067	0.71432
wgEncodeBroadHistoneH1hescH3k36me3StdAln	0.067	0.71432
wgEncodeUwDnaseHEEpiC	0.066	0.716367
wgEncodeDukeDnaseHuh7.5	0.064	0.720515
wgEncodeBroadHistoneNhekH3k4me3StdAln	0.061	0.726875
wgEncodeBroadHistoneGm12878H3k27me3StdAln	0.061	0.726875
wgEncodeBroadHistoneH1hescH3k4me2StdAln	0.06	0.729034
NFYA_all	0.06	0.729034
wgEncodeDukeDnaseMyometr	0.059	0.731214
NRF1_all	0.059	0.731214
SMARCC1_all	0.058	0.733414
RPC155_all	0.058	0.733414
ELK4_all	0.057	0.735635
BRCA1_all	0.057	0.735635
wgEncodeDukeDnaseHPDE6E6E7	0.056	0.737879
CTCFL_all	0.056	0.737879
wgEncodeBroadHistoneH1hescH3k27me3StdAln	0.055	0.740144
GTF3C2_all	0.054	0.742433
EGR1_all	0.054	0.742433
KAP1_all	0.051	0.749443
wgEncodeUWDukeDnaseMCF7	0.05	0.75183
KDM5B_all	0.049	0.754243
NR2C2_all	0.048	0.756684
NFYB_all	0.048	0.756684
wgEncodeUwDnaseHMVECdNeo	0.046	0.76165
TBP_all	0.046	0.76165
wgEncodeUwDnasePrEC	0.045	0.764177
HMGN3_all	0.045	0.764177
THAP1_all	0.044	0.766735
STAT2_all	0.043	0.769325
ZNF274_all	0.041	0.774605
CCNT2_all	0.04	0.777297
ZKSCAN1_all	0.038	0.782793
wgEncodeOpenChromFaireAstrocyPk	0.037	0.785599
wgEncodeBroadHistoneK562H3k79me2StdAln	0.035	0.791337
wgEncodeDukeDnase8988T	0.032	0.800282
wgEncodeBroadHistoneNhlfH3k36me3StdAln	0.032	0.800282
CREB1_all	0.032	0.800282
wgEncodeBroadHistoneNhdfadH3k9acStdAln	0.031	0.803362
ARID3A_all	0.031	0.803362
MYBL2_all	0.03	0.806496
wgEncodeDukeDnaseGM12892	0.029	0.809685
SIRT6_all	0.029	0.809685
HSF1_all	0.027	0.816244
HDAC8_all	0.027	0.816244
PRDM1_all	0.026	0.819619
ZEB1_all	0.025	0.823063
SAP30_all	0.025	0.823063
POLR3G_all	0.024	0.826581
wgEncodeBroadHistoneH1hescH3k4me1StdAln	0.022	0.833854
wgEncodeBroadHistoneGm12878H3k4me3StdAln	0.022	0.833854
NANOG_all	0.021	0.83762
GTF2B_all	0.021	0.83762
POU5F1_all	0.02	0.841481
BDP1_all	0.019	0.845443
wgEncodeBroadHistoneHuvecH3k9acStdAln	0.018	0.849515
wgEncodeBroadHistoneNhaH3k27acStdAln	0.017	0.853707
NFE2_all	0.017	0.853707
wgEncodeBroadHistoneHepg2H3k27me3StdAln	0.016	0.858028
TAF1_all	0.016	0.858028
KDM5A_all	0.016	0.858028
wgEncodeBroadHistoneK562H4k20me1StdAln	0.015	0.86249
wgEncodeBroadHistoneK562H3k36me3StdAln	0.015	0.86249
ESRRA_all	0.015	0.86249
SP2_all	0.014	0.867109
BRF1_all	0.014	0.867109
SREBP1_all	0.013	0.8719
FAM48A_all	0.012	0.876885
wgEncodeBroadHistoneNhaH3k4me3StdAln	0.011	0.882087
wgEncodeBroadHistoneHsmmH2azStdAln	0.009	0.893273
wgEncodeBroadHistoneNhekH3k36me3StdAln	0.008	0.899343
SMARCC2_all	0.008	0.899343
HDAC6_all	0.007	0.905813
BRF2_all	0.007	0.905813
ZNF263_all	0.006	0.912771
wgEncodeBroadHistoneGm12878H3k36me3StdAln	0.006	0.912771
GRp20_all	0.005	0.920344
ZZZ3_all	0.004	0.92873
wgEncodeBroadHistoneNhekH3k27me3StdAln	0.004	0.92873
RFX5_all	0.004	0.92873
RDBP_all	0.004	0.92873
IRF1_all	0.004	0.92873
wgEncodeUwDnaseHMVECdAd	0.003	0.938258
ZNF217_all	0.002	0.949571
wgEncodeOpenChromFaireHelas3Ifna4hPk	0.002	0.949571
PPARGC1A_all	0.002	0.949571
IRF3_all	0.002	0.949571
ESR1_all	0.002	0.949571
SMC3_all	0.001	0.964329
YY1_all	0	1
wgEncodeOpenChromFaireNhekPk	0	1
wgEncodeBroadHistoneNhekH3k9me1StdAln	0	1
wgEncodeBroadHistoneNhekH3k4me2StdAln	0	1
UBTF_all	0	1
TCF3_all	0	1

## Sheet: Celiac
Dataset	llike.ratio	p value	Odds Ratio
T-bet_Th1_10-7-peaks	10.976	2.79555e-06	3.09375
SPI1_all	10.177	6.43584e-06	3.21875
Th2_H3K27ac_active_enhancers	9.784	9.70817e-06	2.29102
POU2F2_K562	9.527	1.27071e-05	3.69336
Th1_H3K27ac_active_enhancers	9.303	1.60714e-05	2.39648
IRF4_all	9.019	2.16539e-05	3.64062
ATF2_all	8.954	2.31844e-05	3.19922
POU2F2_all	8.953	2.32088e-05	3.29102
NFATC1_all	8.584	3.42152e-05	3.33594
BCL11A_all	8.58	3.43596e-05	3.63281
RUNX3_all	8.097	5.71749e-05	2.78125
SP1_all	8.02	6.20183e-05	3.11719
FOXM1_all	7.695	8.74499e-05	2.99805
RELA_all	7.653	9.14257e-05	2.80469
wgEncodeOpenChromFaireGm19239Pk	6.982	0.000186345	2.54688
TAF1_K562	6.932	0.000196527	3.44922
BATF_all	6.856	0.000213089	3.22656
TCF3_all	6.855	0.000213316	3.30273
Birzele_merged_ChIP_Hs_Treg_FOXP3	6.759	0.000236286	2.88086
CTBP2_LCL	6.458	0.000325785
wgEncodeOpenChromFaireGm12892Pk	6.439	0.000332467	2.39648
FOSL1_all	6.353	0.000364484	3.91016
POLR2A_LCL	6.244	0.000409574	2.22461
PAX5_all	6.061	0.000498304	3.05273
wgEncodeUwDnaseTh2fdr01peakshg19	6.002	0.000530865	2.5957
EBF1_all	5.926	0.000575995	2.72461
wgEncodeDukeDnaseTh0fdr01peakshg19	5.865	0.000615006	2.4082
TBL1XR1_all	5.498	0.000913087	2.89453
wgEncodeDukeDnaseGM19239fdr01peakshg19	5.441	0.000971033	2.7168
wgEncodeUwDnaseCD20fdr01peakshg19	5.323	0.00110309	2.54883
TAF1_all	5.254	0.00118859	2.68945
PML_all	5.182	0.00128496	2.80273
MTA3_all	5.17	0.00130178	2.89062
MEF2C_all	5.087	0.00142435	3.43164
CEBPB_all	4.984	0.00159284	2.43945
BCL3_K562	4.962	0.00163137	3.48242
FOXM1_LCL	4.938	0.00167449	3.94531
GABPA_all	4.91	0.00172624	3.08398
wgEncodeUwDnaseNB4fdr01peakshg19	4.88	0.0017835	2.61914
wgEncodeDukeDnaseFibroblfdr01peakshg19	4.841	0.00186082	2.12891
POLR2A_K562	4.839	0.00186488	2.13867
STAT5A_all	4.796	0.00195427	2.97266
wgEncodeUwDnaseGM12865fdr01peakshg19	4.631	0.00233957	2.55078
wgEncodeUwDnaseAG04449fdr01peakshg19	4.585	0.00246015	2.68164
wgEncodeDukeDnaseHSMMembfdr01peakshg19	4.579	0.00247633	2.61523
NFIC_all	4.567	0.00250903	2.3418
MEF2A_all	4.553	0.00254772	3.12695
ATF1_LCL	4.443	0.00287366	5.61133
ZNF263_LCL	4.406	0.00299256	4.14258
wgEncodeDukeDnaseGM19240fdr01peakshg19	4.338	0.00322428	2.46875
wgEncodeBroadHistoneGm12878H3k4me2StdAln	4.261	0.00350879	1.71289
POLR2A_all	4.085	0.00425889	1.71289
wgEncodeBroadHistoneHelas3H3k9acStdAln	4.081	0.00427772	2.02344
wgEncodeUwDnaseMonocytesCD14RO01746fdr01peakshg19	4.043	0.00446085	2.44531
wgEncodeUWDukeDnaseHeLaS3fdr01peakshg19	3.937	0.00501506	2.32031
TAF7_K562	3.928	0.00506523	4.86328
wgEncodeDukeDnaseGM12892fdr01peakshg19	3.916	0.00513293	2.33203
wgEncodeUWDukeDnaseGM12878fdr01peakshg19	3.906	0.00519004	2.31641
SIN3A_all	3.892	0.0052711	2.69922
wgEncodeDukeDnaseGM18507fdr01peakshg19	3.816	0.00573417	2.37109
wgEncodeBroadHistoneK562H3k4me1StdAln	3.738	0.00625268	1.42383
TCF3_K562	3.67	0.00674368	3.92578
CHD1_all	3.666	0.00677376	2.72852
wgEncodeDukeDnaseGM19238fdr01peakshg19	3.638	0.0069882	2.24023
wgEncodeUwDnaseGM06990fdr01peakshg19	3.587	0.00739677	2.31445
BCLAF1_all	3.538	0.00781232	3.12109
wgEncodeOpenChromFaireGm12878Pk	3.485	0.00828875	2.25195
JUN_all	3.425	0.00886413	2.53711
TCF12_all	3.394	0.00917727	2.38867
wgEncodeBroadHistoneNhlfH4k20me1StdAln	3.371	0.0094169	3.58594
CEBPB_K562	3.352	0.00961969	2.45898
BHLHE40_all	3.348	0.00966295	2.46484
CHD1_K562	3.336	0.00979392	3.04688
wgEncodeUwDnaseBJfdr01peakshg19	3.32	0.00997139	2.58008
ATF2_LCL	3.288	0.0103363	3.44922
CTBP2_all	3.205	0.0113479	3.62695
RDBP_all	3.192	0.0115154	7.66016
MYC_K562	3.191	0.0115283	2.44727
HDAC2_LCL	3.191	0.0115283	5.33984
wgEncodeBroadHistoneNhaH3k27acStdAln	3.16	0.0119384	1.70117
MAZ_K562	3.102	0.0127462	2.87305
ZBTB33_all	3.081	0.0130524	2.81055
PAX5_LCL	3.064	0.0133057	3.38281
YY1_all	3.032	0.0137965	2.15234
RELA_K562	2.969	0.0148178	2.32031
GATA3_K562	2.927	0.0155417	3.21875
wgEncodeBroadHistoneGm12878H3k4me1StdAln	2.905	0.0159353	1.30273
wgEncodeBroadHistoneK562H3k79me2StdAln	2.893	0.0161543	1.63086
JUND_all	2.893	0.0161543	2.12305
PRDM1_all	2.891	0.0161911	3.92578
wgEncodeBroadHistoneHsmmtH3k27acStdAln	2.879	0.0164137	1.44531
GATA3_Th2	2.833	0.0172969	2.69141
MYC_all	2.814	0.0176758	1.95898
SP4_K562	2.805	0.0178583	3.82031
IRF1_all	2.76	0.0188003	2.91797
wgEncodeBroadHistoneK562H2azStdAln	2.724	0.0195907	1.39844
wgEncodeBroadHistoneHepg2H3k9acStdAln	2.699	0.0201598	1.6875
wgEncodeBroadHistoneHsmmtH3k79me2StdAln	2.685	0.020486	1.55469
IRF4_K562	2.679	0.0206274	3.8125
wgEncodeBroadHistoneHepg2H3k79me2StdAln	2.614	0.0222261	1.83789
wgEncodeUwDnaseSAECfdr01peakshg19	2.606	0.0224315	2.23828
wgEncodeBroadHistoneOsteoblH3k27acStdAln	2.549	0.0239534	1.36719
FAM48A_all	2.547	0.0240088	5.25
EP300_all	2.52	0.0247685	1.8125
SETDB1_K562	2.505	0.0252013	3.4082
wgEncodeUWDukeDnaseTh1fdr01peakshg19	2.475	0.0260907	1.61133
Th1.Dnase.UW	2.475	0.0260907	1.61133
IRF1_K562	2.471	0.0262117	3.23633
wgEncodeBroadHistoneHmecH3k9acStdAln	2.462	0.0264861	1.75586
wgEncodeBroadHistoneHuvecH3k27acStdAln	2.431	0.0274545	1.50195
wgEncodeUwDnaseGM12864fdr01peakshg19	2.413	0.0280336	2.19727
wgEncodeBroadHistoneHuvecH3k4me1StdAln	2.391	0.0287587	1.45117
SP1_LCL	2.384	0.0289935	3.65039
STAT3_LCL	2.366	0.0296064	2.93555
wgEncodeBroadHistoneHsmmH3k4me3StdAln	2.361	0.0297791	1.65625
RELA_LCL	2.325	0.0310535	2.72461
wgEncodeOpenChromFaireGm18507Pk	2.317	0.0313444	1.74219
wgEncodeUwDnasePANC1fdr01peakshg19	2.301	0.0319347	1.95898
ZBTB7A_K562	2.293	0.0322342	3.59375
BCL3_all	2.287	0.0324607	2.11328
wgEncodeOpenChromFaireHelas3Ifng4hPk	2.282	0.0326507	1.71484
wgEncodeDukeDnaseAoSMCfdr01peakshg19	2.255	0.0336972	2.14648
FOXM1_K562	2.252	0.0338157	2.76953
wgEncodeUwDnaseHCFaafdr01peakshg19	2.228	0.0347788	2.11914
wgEncodeUwDnaseHRCEpiCfdr01peakshg19	2.211	0.0354784	2.13086
wgEncodeBroadHistoneK562H3k27acStdAln	2.181	0.0367491	1.54688
wgEncodeUwDnaseHCFfdr01peakshg19	2.171	0.0371832	2.0918
wgEncodeBroadHistoneNhlfH3k27me3StdAln	2.156	0.0378444
wgEncodeUwDnaseCD34Mobilizedfdr01peakshg19	2.152	0.0380228	2.30664
wgEncodeBroadHistoneHmecH3k27acStdAln	2.152	0.0380228	1.51562
EP300_LCL	2.12	0.0394822	2.53906
ATF3_all	2.12	0.0394822	2.32031
GATA1_LCL	2.104	0.0402337	4.7793
MXI1_all	2.095	0.0406631	2.12109
GATA3_LCL	2.06	0.0423791	3.07422
wgEncodeBroadHistoneOsteoblH3k4me2StdAln	2.055	0.0426304	1.32031
wgEncodeBroadHistoneHsmmtH3k9acStdAln	2.055	0.0426304	1.50977
ELF1_all	2.05	0.0428832	2.23633
wgEncodeBroadHistoneHmecH3k4me3StdAln	2.038	0.0434965	1.75586
wgEncodeDukeDnaseRWPE1fdr01peakshg19	2.031	0.0438585	2.08984
STAT3_all	2.024	0.0442237	2.18555
ELF1_LCL	2.018	0.0445393	3.76562
wgEncodeBroadHistoneH1hescH3k4me3StdAln	2.015	0.0446979	1.86328
GTF2F1_K562	2.003	0.0453386	4.23242
SUZ12_all	1.982	0.0464831	3.01953
NR3C1_all	1.959	0.0477717	2.45508
BCL3_LCL	1.939	0.0489228	2.93945
SMC3_LCL	1.937	0.0490395	3.33594
wgEncodeBroadHistoneHsmmH4k20me1StdAln	1.929	0.0495093	2.4043
wgEncodeBroadHistoneNhekH3k36me3StdAln	1.921	0.0499839	1.48438
FOXP2_all	1.914	0.050403	2.87891
ATF1_all	1.909	0.0507047	2.8457
wgEncodeBroadHistoneHsmmH3k79me2StdAln	1.891	0.0518067	1.30664
REST_LCL	1.883	0.0523046	2.91797
RAD21_all	1.876	0.0527444	1.91211
GABPA_LCL	1.874	0.0528707	2.9082
ATF2_K562	1.866	0.0533794	2.64648
GATA3_Th1	1.841	0.0550028	2.33008
wgEncodeDukeDnaseUrotheliafdr01peakshg19	1.839	0.0551349	1.95898
wgEncodeBroadHistoneHuvecH3k4me3StdAln	1.837	0.0552674	1.56641
PAX5_K562	1.808	0.0572263	2.82422
wgEncodeBroadHistoneNhlfH3k27acStdAln	1.777	0.0594021	1.26562
wgEncodeUwDnaseCMKfdr01peakshg19	1.768	0.0600501	2.19727
MAX_LCL	1.754	0.0610731	2.33008
GATA3_all	1.716	0.0639446	2.10352
wgEncodeDukeDnaseCLLfdr01peakshg19	1.714	0.0640997	2.26953
ZNF217_K562	1.713	0.0641774	3.58594
FOS_all	1.712	0.0642551	1.74805
MTA3_LCL	1.706	0.064724	3.52539
wgEncodeBroadHistoneNhekH3k27me3StdAln	1.7	0.0651964
wgEncodeBroadHistoneNhaH3k4me3StdAln	1.699	0.0652755	1.68164
wgEncodeBroadHistoneGm12878H3k79me2StdAln	1.695	0.0655929	1.08008
wgEncodeBroadHistoneHelas3H3k27acStdAln	1.674	0.0672867	1.56641
wgEncodeBroadHistoneGm12878H3k27acStdAln	1.674	0.0672867	1.16797
wgEncodeBroadHistoneNhekH3k4me2StdAln	1.672	0.0674505	1.33203
MAZ_all	1.665	0.0680269	1.73047
wgEncodeBroadHistoneNhekH3k9acStdAln	1.662	0.0682755	1.51562
wgEncodeOpenChromFaireGlioblaPk	1.654	0.0689434	1.84766
UBTF_K562	1.647	0.0695334	4.12109
wgEncodeBroadHistoneHsmmH3k27me3StdAln	1.619	0.0719484
MAFK_all	1.605	0.0731895	1.97461
FOSL2_all	1.602	0.0734584	2.04883
wgEncodeUwDnasePrECfdr01peakshg19	1.596	0.0739994	1.83203
wgEncodeBroadHistoneHmecH3k4me2StdAln	1.59	0.0745447	1.31836
JUNB_all	1.581	0.0753708	2.47852
EGR1_K562	1.544	0.0788717	3.74414
MAX_all	1.535	0.0797495	1.64453
USF1_LCL	1.534	0.0798477	2.47852
MBD4_K562	1.532	0.0800444	3.45312
wgEncodeBroadHistoneHepg2H3k4me2StdAln	1.529	0.0803405	1.13477
wgEncodeUWDukeDnaseHepG2fdr01peakshg19	1.493	0.0839874	1.76172
wgEncodeDukeDnaseHepatocytesfdr01peakshg19	1.491	0.0841952	1.83984
wgEncodeUwDnaseHMVECLLyfdr01peakshg19	1.486	0.0847171	2.01758
wgEncodeBroadHistoneGm12878H4k20me1StdAln	1.484	0.0849268	1.91016
SP2_LCL	1.482	0.0851371	5.25
MEF2C_K562	1.464	0.0870553	3.58594
UBTF_LCL	1.447	0.0889099	5.30469
RAD21_LCL	1.446	0.0890204	2.7207
wgEncodeBroadHistoneK562H3k36me3StdAln	1.439	0.0897975	1.34375
SAP30_all	1.436	0.0901328	3.98633
wgEncodeBroadHistoneK562H3k4me2StdAln	1.434	0.0903571	1.24414
JUND_LCL	1.429	0.0909205	3.04688
FOXA1_K562	1.423	0.0916016	2.32422
SMARCC1_LCL	1.422	0.0917156	6.66406
BATF_LCL	1.415	0.0925184	4.43945
SP4_all	1.412	0.0928647	2.4043
wgEncodeBroadHistoneGm12878H3k4me3StdAln	1.397	0.0946178	1.08789
wgEncodeUwDnaseHMVECdAdfdr01peakshg19	1.396	0.0947359	1.86133
wgEncodeBroadHistoneHelas3H3k4me2StdAln	1.395	0.0948542	1.2168
wgEncodeBroadHistoneNhlfH3k4me2StdAln	1.383	0.0962865	1.24609
wgEncodeDukeDnaseStellatefdr01peakshg19	1.375	0.0972544	1.76562
TBL1XR1_LCL	1.371	0.0977424	3.41992
SIN3A_K562	1.36	0.099098	2.32031
UBTF_all	1.35	0.100348	2.87695
wgEncodeBroadHistoneHsmmtH3k4me2StdAln	1.336	0.102128	1.16211
wgEncodeBroadHistoneHsmmtH3k4me1StdAln	1.331	0.102771	1.16797
wgEncodeUWDukeDnaseHUVECfdr01peakshg19	1.308	0.105791	1.72656
wgEncodeDukeDnaseMelanofdr01peakshg19	1.304	0.106326	1.47656
wgEncodeBroadHistoneHsmmtH3k4me3StdAln	1.304	0.106326	1.5625
SRF_all	1.288	0.108496	3.07617
wgEncodeDukeDnasePanIsletDfdr01peakshg19	1.26	0.112411	1.6543
IKZF1_all	1.25	0.113846	1.80469
wgEncodeBroadHistoneHsmmH3k9acStdAln	1.248	0.114136	1.32227
wgEncodeBroadHistoneHsmmH3k4me2StdAln	1.234	0.116186	1.125
wgEncodeUwDnaseHMVECdBlNeofdr01peakshg19	1.232	0.116482	1.67969
wgEncodeUWDukeDnaseHSMMfdr01peakshg19	1.227	0.117226	1.5332
wgEncodeBroadHistoneNhlfH3k36me3StdAln	1.224	0.117675	1.33008
E2F1_all	1.205	0.120562	2.00977
wgEncodeUwDnaseHL60fdr01peakshg19	1.204	0.120717	1.95312
NR3C1_LCL	1.199	0.12149	4.00781
RDBP_LCL	1.189	0.123055
wgEncodeBroadHistoneHelas3H3k4me3StdAln	1.188	0.123213	1.17578
wgEncodeBroadHistoneHepg2H3k36me3StdAln	1.182	0.124163	1.21094
BCL11A_K562	1.174	0.125444	3.19727
wgEncodeBroadHistoneHuvecH3k36me3StdAln	1.168	0.126414	1.20117
STAT3_K562	1.157	0.128214	2.02734
REST_all	1.155	0.128544	1.54297
wgEncodeOpenChromFaireUrotsaUt189Pk	1.152	0.129041	1.71289
wgEncodeUwDnaseHPAECfdr01peakshg19	1.151	0.129208	1.67188
wgEncodeBroadHistoneNhdfadH3k27acStdAln	1.149	0.129541	1.22852
TCF12_K562	1.146	0.130042	2.95703
wgEncodeDukeDnaseGlioblafdr01peakshg19	1.145	0.13021	1.55078
GATA2_K562	1.142	0.130714	2.01367
wgEncodeUwDnaseHMVECdLyNeofdr01peakshg19	1.14	0.131052	1.69531
wgEncodeBroadHistoneHelas3H3k79me2StdAln	1.138	0.13139	1.22852
wgEncodeUwDnaseAG09319fdr01peakshg19	1.136	0.13173	1.71094
wgEncodeUWDukeDnaseLNCaPfdr01peakshg19	1.129	0.132926	1.44922
wgEncodeUwDnaseHRGECfdr01peakshg19	1.121	0.134307	1.7168
STAT5A_LCL	1.113	0.135705	2.85547
wgEncodeBroadHistoneHsmmH3k27acStdAln	1.105	0.137119	1.05078
wgEncodeBroadHistoneHuvecH3k27me3StdAln	1.093	0.139271
wgEncodeUWDukeDnaseHSMMtubefdr01peakshg19	1.09	0.139814	1.39453
wgEncodeBroadHistoneH1hescH3k36me3StdAln	1.067	0.144064	1.54297
GTF2F1_LCL	1.063	0.144818	3.94141
MBD4_all	1.061	0.145197	2.58984
wgEncodeDukeDnaseFibroPfdr01peakshg19	1.06	0.145387	1.43359
wgEncodeUWDukeDnaseK562fdr01peakshg19	1.051	0.147107	1.44727
wgEncodeBroadHistoneNhdfadH3k4me3StdAln	1.048	0.147685	1.36523
TBP_all	1.048	0.147685	1.79492
wgEncodeUwDnaseHAcfdr01peakshg19	1.04	0.14924	1.84766
wgEncodeBroadHistoneHsmmtH3k36me3StdAln	1.037	0.149828	1.0332
wgEncodeBroadHistoneGm12878H3k9acStdAln	1.034	0.150419	0.943359
TCF7L2_LCL	1.034	0.150419	1.94727
KDM5B_LCL	1.03	0.15121	3.75
wgEncodeBroadHistoneHepg2H3k4me3StdAln	1.012	0.154831	1.18945
wgEncodeOpenChromFaireNhekPk	0.991	0.15918	1.4668
wgEncodeDukeDnaseGM12891fdr01peakshg19	0.989	0.159601	1.71094
STAT5A_K562	0.988	0.159812	3.31641
wgEncodeBroadHistoneHmecH4k20me1StdAln	0.956	0.166741	2.13281
CHD2_all	0.943	0.169654	1.83008
ETS1_K562	0.938	0.170789	2.97656
wgEncodeUWDukeDnaseA549fdr01peakshg19	0.937	0.171018	1.51953
CEBPB_LCL	0.936	0.171246	2.17188
wgEncodeBroadHistoneK562H3k4me3StdAln	0.921	0.174717	1.06445
SMC3_all	0.921	0.174717	1.98828
MAFK_K562	0.91	0.177313	1.75586
wgEncodeBroadHistoneOsteoblH2azStdAln	0.867	0.187901
wgEncodeOpenChromFaireGm12891Pk	0.864	0.188667	1.09961
wgEncodeBroadHistoneNhaH3k27me3StdAln	0.86	0.189693
ZNF263_all	0.855	0.190985	1.6582
wgEncodeOpenChromFaireHuvecPk	0.842	0.194394	1.32227
wgEncodeBroadHistoneGm12878H2azStdAln	0.838	0.195457	0.945312
wgEncodeUwDnaseNHAfdr01peakshg19	0.833	0.196795	1.89453
EBF1_LCL	0.827	0.198415	2.78125
RAD21_K562	0.821	0.200051	1.5332
wgEncodeOpenChromFaireHelas3Ifna4hPk	0.82	0.200325
wgEncodeBroadHistoneHuvecH3k4me2StdAln	0.82	0.200325	1
wgEncodeDukeDnaseHTR8svnfdr01peakshg19	0.815	0.201703	1.41406
wgEncodeBroadHistoneNhekH4k20me1StdAln	0.813	0.202257	1.48047
TAL1_LCL	0.812	0.202535	4.7207
wgEncodeUwDnaseHMVECdBlAdfdr01peakshg19	0.799	0.206187	1.44141
RCOR1_K562	0.797	0.206756	1.61719
wgEncodeUwDnaseAG10803fdr01peakshg19	0.792	0.208185	1.87891
wgEncodeBroadHistoneHmecH3k36me3StdAln	0.79	0.208761	1.2832
wgEncodeBroadHistoneNhekH3k27acStdAln	0.788	0.209338	1.10156
HDAC1_all	0.788	0.209338	3.02539
wgEncodeBroadHistoneH1hescH3k27acStdAln	0.784	0.210498	1.39258
FOXP2_LCL	0.775	0.213135	4.28906
ZBTB7A_all	0.771	0.21432	2.09766
NR2F2_LCL	0.771	0.21432	4.09766
wgEncodeBroadHistoneHepg2H2azStdAln	0.736	0.22503	1.17188
wgEncodeBroadHistoneGm12878H3k27me3StdAln	0.716	0.231438
wgEncodeUwDnaseHREfdr01peakshg19	0.694	0.238743	1.33008
PHF8_all	0.668	0.247741	2.39258
REST_K562	0.666	0.24845	1.89453
wgEncodeBroadHistoneHmecH3k4me1StdAln	0.665	0.248805	0.800781
BRCA1_K562	0.66	0.250592	5.37109
FOXA2_all	0.658	0.251311	1.44727
wgEncodeDukeDnaseProgFibfdr01peakshg19	0.64	0.257899	1.21094
TAF7_all	0.638	0.258644	2.22461
wgEncodeUwDnaseWERIRb1fdr01peakshg19	0.628	0.26241
wgEncodeBroadHistoneHelas3H3k36me3StdAln	0.627	0.26279	1.04492
wgEncodeOpenChromFaireK562NabutPk	0.621	0.265086	1.33398
wgEncodeUWDukeDnaseMCF7fdr01peakshg19	0.617	0.266631	1.25195
RUNX3_K562	0.616	0.267018	2.39844
wgEncodeBroadHistoneH1hescH3k4me1StdAln	0.615	0.267407
SETDB1_all	0.613	0.268186	1.5332
KAP1_LCL	0.608	0.270147	3.24805
ATF3_K562	0.606	0.270936	2.08789
wgEncodeUwDnaseHCT116fdr01peakshg19	0.602	0.272524	1.26953
RCOR1_all	0.597	0.274524	1.32422
wgEncodeUwDnaseHGFfdr01peakshg19	0.589	0.277764	1.26367
wgEncodeBroadHistoneNhlfH3k9acStdAln	0.586	0.278991	1.19531
MAFF_all	0.581	0.281051	2.0293
USF1_all	0.58	0.281466	1.28125
wgEncodeBroadHistoneNhlfH3k4me3StdAln	0.576	0.283131	1.1543
PRDM1_LCL	0.57	0.285652	6.34766
JUND_K562	0.558	0.290781	1.85742
wgEncodeBroadHistoneHsmmH3k36me3StdAln	0.538	0.299594	0.933594
EZH2_all	0.535	0.300945	1.8418
FOS_K562	0.523	0.30643	1.73242
wgEncodeDukeDnasepHTEfdr01peakshg19	0.522	0.306893	1.07617
wgEncodeDukeDnaseOsteoblfdr01peakshg19	0.521	0.307357	0.996094
wgEncodeBroadHistoneHuvecH3k9acStdAln	0.51	0.312519	0.849609
wgEncodeDukeDnaseIshikawaEstradiolfdr01peakshg19	0.507	0.313946
wgEncodeUWDukeDnaseHMECfdr01peakshg19	0.502	0.316345	1.00977
CTCF_all	0.493	0.320722
wgEncodeDukeDnaseHuh7fdr01peakshg19	0.492	0.321213
wgEncodeOpenChromFaireK562Pk	0.482	0.326181
wgEncodeUwDnaseHPAFfdr01peakshg19	0.478	0.328197
wgEncodeUwDnaseJurkatfdr01peakshg19	0.477	0.328703	1.36133
POU2F2_LCL	0.475	0.329719	2.16016
wgEncodeBroadHistoneK562H3k9me3StdAln	0.472	0.331251	1.43359
GATA2_all	0.472	0.331251	1.13281
ZBTB7A_LCL	0.465	0.334863	2.83594
wgEncodeBroadHistoneNhekH3k4me3StdAln	0.461	0.33695	0.962891
SPI1_K562	0.451	0.342246	1.88867
THAP1_all	0.442	0.347108	3.74609
wgEncodeBroadHistoneHsmmtH2azStdAln	0.441	0.347654	0.800781
wgEncodeDukeDnasePanIsletsfdr01peakshg19	0.438	0.3493	1.49609
wgEncodeDukeDnaseMedullofdr01peakshg19	0.436	0.350402
wgEncodeBroadHistoneHepg2H4k20me1StdAln	0.431	0.35318
wgEncodeUwDnaseNT2D1fdr01peakshg19	0.427	0.355423
TCF7L2_all	0.427	0.355423	1.05469
USF2_all	0.421	0.358825	1.76758
wgEncodeUwDnaseNHDFAdfdr01peakshg19	0.418	0.360543
MEF2A_K562	0.414	0.362851	3.33398
wgEncodeBroadHistoneNhaH3k36me3StdAln	0.403	0.369306	0.751953
SRF_K562	0.396	0.373496	4.28711
wgEncodeBroadHistoneH1hescH3k9acStdAln	0.392	0.375921	1.42578
HNF4G_LCL	0.391	0.37653	4.17188
wgEncodeDukeDnaseChorionfdr01peakshg19	0.385	0.380217	0.972656
ZNF217_all	0.383	0.381457	1.72852
wgEncodeBroadHistoneHsmmH3k9me3StdAln	0.383	0.381457
EGR1_all	0.379	0.383955	1.74023
wgEncodeUwDnaseHMFfdr01peakshg19	0.372	0.388383
wgEncodeBroadHistoneNhdfadH3k4me2StdAln	0.369	0.390302	0.654297
wgEncodeBroadHistoneNhekH3k9me1StdAln	0.368	0.390945	1.37305
wgEncodeBroadHistoneHsmmtH4k20me1StdAln	0.366	0.392236	0.808594
wgEncodeOpenChromFaireK562OhureaPk	0.363	0.394183	1.00195
wgEncodeDukeDnaseLNCaPAndrogenfdr01peakshg19	0.361	0.395489
CHD2_LCL	0.358	0.397459	2.38281
FOS_LCL	0.356	0.398781	2.04688
HNF4A_LCL	0.349	0.403457	3.93945
wgEncodeUwDnaseNHDFneofdr01peakshg19	0.342	0.408213
wgEncodeUwDnaseHVMFfdr01peakshg19	0.335	0.413052	1.55078
wgEncodeBroadHistoneNhekH3k4me1StdAln	0.335	0.413052	0.681641
KDM5B_all	0.331	0.415855	2.12695
wgEncodeBroadHistoneK562H3k9acStdAln	0.329	0.417267	0.783203
wgEncodeUwDnaseHRPEpiCfdr01peakshg19	0.323	0.421546
CTCF_K562	0.318	0.425163
wgEncodeBroadHistoneHelas3H4k20me1StdAln	0.306	0.434036
SETDB1_LCL	0.304	0.435542	2.20508
wgEncodeOpenChromFaireHepg2Pk	0.298	0.440108
wgEncodeBroadHistoneH1hescH4k20me1StdAln	0.297	0.440876	1.15625
TEAD4_K562	0.291	0.445529	2.07422
wgEncodeBroadHistoneH1hescH3k4me2StdAln	0.284	0.451055	0.738281
TFAP2C_all	0.283	0.451853
ELK1_all	0.283	0.451853	1.94336
wgEncodeDukeDnase8988Tfdr01peakshg19	0.281	0.453456
NFATC1_LCL	0.279	0.455067	2.04297
CCNT2_LCL	0.279	0.455067	2.5
wgEncodeDukeDnaseT47Dfdr01peakshg19	0.274	0.459136	0.857422
WRNIP1_all	0.268	0.464095	1.25977
RXRA_all	0.265	0.466607	1.69922
wgEncodeDukeDnaseiPSfdr01peakshg19	0.263	0.468293
wgEncodeBroadHistoneGm12878H3k36me3StdAln	0.256	0.474274	0.521484
wgEncodeUwDnaseHAspfdr01peakshg19	0.255	0.475139	0.814453
wgEncodeUwDnaseHAhfdr01peakshg19	0.254	0.476006
RFX5_all	0.254	0.476006
wgEncodeUwDnaseHFFfdr01peakshg19	0.252	0.477748	1.21094
wgEncodeBroadHistoneHepg2H3k27acStdAln	0.248	0.481263	0.804688
TBP_LCL	0.243	0.485717	1.62109
wgEncodeUwDnaseHMVECdLyAdfdr01peakshg19	0.239	0.48933
wgEncodeUwDnaseWI38fdr01peakshg19	0.238	0.49024
SMARCC2_all	0.236	0.492069	4.01562
TBL1XR1_K562	0.233	0.494833	1.625
wgEncodeUwDnaseHConFfdr01peakshg19	0.232	0.49576	1.17383
CHD1_LCL	0.229	0.49856	4.04102
wgEncodeDukeDnaseMCF7Hypoxiafdr01peakshg19	0.226	0.501387
ATF3_LCL	0.226	0.501387
PML_K562	0.22	0.507122
NFKB_binding_regions	0.22	0.507122
wgEncodeBroadHistoneHmecH3k27me3StdAln	0.216	0.511009
wgEncodeBroadHistoneOsteoblH3k36me3StdAln	0.214	0.512972
wgEncodeUwDnaseHFFMycfdr01peakshg19	0.21	0.516937
wgEncodeBroadHistoneHelas3H3k27me3StdAln	0.208	0.51894
TFAP2A_all	0.204	0.522986
Hawkins_TableS2a_Th1_enhancers	0.204	0.522986
EBF1_K562	0.204	0.522986
wgEncodeUwDnaseHEEpiCfdr01peakshg19	0.203	0.524007
TEAD4_all	0.199	0.528124
FOXA1_all	0.196	0.53125
ARID3A_all	0.196	0.53125
wgEncodeBroadHistoneOsteoblH3k4me1StdAln	0.193	0.53441
wgEncodeBroadHistoneHsmmH3k4me1StdAln	0.188	0.539752
wgEncodeUwDnaseBE2Cfdr01peakshg19	0.186	0.541916
POU5F1_LCL	0.184	0.544096
MXI1_K562	0.18	0.548506
ZBTB33_LCL	0.178	0.550736
CTCF_LCL	0.172	0.557529
wgEncodeBroadHistoneNhdfadH3k27me3StdAln	0.166	0.564484
NFIC_K562	0.162	0.569214
wgEncodeOpenChromFaireA549Pk	0.16	0.571608
wgEncodeOpenChromFaireHelas3Pk	0.159	0.572812
SAP30_K562	0.159	0.572812
EZH2_LCL	0.159	0.572812
MYC_LCL	0.158	0.574021
wgEncodeDukeDnaseHuh75fdr01peakshg19	0.155	0.57768
wgEncodeUwDnaseWI38TamoxifenTamoxifenfdr01peakshg19	0.151	0.582631
wgEncodeOpenChromFaireH1hescPk	0.148	0.586401
wgEncodeUwDnaseNHLFfdr01peakshg19	0.147	0.587669
USF1_K562	0.143	0.592795
wgEncodeUwDnaseSKMCfdr01peakshg19	0.14	0.596701
wgEncodeDukeDnaseIshikawaTamoxifenfdr01peakshg19	0.14	0.596701
TCF7L2_K562	0.139	0.598015
BCLAF1_K562	0.139	0.598015
wgEncodeDukeDnaseH9ESfdr01peakshg19	0.138	0.599335
HDAC2_all	0.138	0.599335
KDM5B_K562	0.137	0.600661
ETS1_all	0.137	0.600661
STAT1_all	0.136	0.601993
MYBL2_all	0.132	0.607385
wgEncodeUWDukeDnaseH1hESCfdr01peakshg19	0.128	0.612882
wgEncodeBroadHistoneHuvecH4k20me1StdAln	0.127	0.614273
NFIC_LCL	0.126	0.61567
EZH2_K562	0.124	0.618487
SMARCB1_all	0.123	0.619906
wgEncodeOpenChromFaireMedulloPk	0.122	0.621332
FOSL2_K562	0.122	0.621332
wgEncodeUwDnaseAoAFfdr01peakshg19	0.121	0.622765
HNF4G_all	0.12	0.624206
wgEncodeUwDnaseHCMfdr01peakshg19	0.116	0.630045
wgEncodeBroadHistoneNhdfadH3k9acStdAln	0.116	0.630045
CHD2_K562	0.115	0.631524
CEBPD_all	0.114	0.633011
PBX3_all	0.113	0.634506
RCOR1_LCL	0.111	0.63752
NFYA_all	0.111	0.63752
BHLHE40_K562	0.111	0.63752
SIX5_all	0.107	0.64365
wgEncodeUwDnaseHPdLFfdr01peakshg19	0.103	0.649921
ESR1_K562	0.103	0.649921
ELK4_all	0.1	0.654721
RFX5_K562	0.099	0.65634
YY1_LCL	0.095	0.662917
KAP1_all	0.095	0.662917
YY1_K562	0.093	0.666267
wgEncodeBroadHistoneOsteoblH3k9me3StdAln	0.092	0.667958
SIX5_K562	0.091	0.66966
wgEncodeOpenChromFaireHtr8Pk	0.09	0.671373
MXI1_LCL	0.09	0.671373
TRIM28_K562	0.089	0.673098
ZEB1_all	0.088	0.674834
NRF1_all	0.087	0.676581
ZNF143_all	0.086	0.67834
WRNIP1_LCL	0.084	0.681895
SMARCA4_all	0.082	0.6855
TFAP2C_K562	0.081	0.687322
ELK1_K562	0.081	0.687322
wgEncodeBroadHistoneNhaH3k4me1StdAln	0.079	0.691005
ZNF143_LCL	0.078	0.692866
E2F6_all	0.078	0.692866
wgEncodeUwDnaseCaco2fdr01peakshg19	0.076	0.696631
USF2_LCL	0.076	0.696631
GATA1_K562	0.076	0.696631
MTA3_K562	0.075	0.698535
wgEncodeUwDnaseAG04450fdr01peakshg19	0.074	0.700454
KAP1_K562	0.074	0.700454
CBX3_all	0.074	0.700454
SIN3AK20_LCL	0.073	0.702388
IKZF1_LCL	0.073	0.702388
ZNF263_K562	0.071	0.706301
HDAC2_K562	0.071	0.706301
wgEncodeUwDnaseSKNMCfdr01peakshg19	0.07	0.708281
TCF12_LCL	0.07	0.708281
wgEncodeOpenChromFaireNhbePk	0.069	0.710277
TEAD4_LCL	0.069	0.710277
HDAC8_all	0.069	0.710277
ESR1_all	0.069	0.710277
SMARCC1_K562	0.068	0.71229
RBBP5_all	0.065	0.718432
ETS1_LCL	0.065	0.718432
E2F4_K562	0.065	0.718432
E2F1_LCL	0.065	0.718432
SIN3AK20_K562	0.064	0.720515
GATA1_all	0.063	0.722616
EP300_K562	0.062	0.724736
ZNF274_all	0.061	0.726875
TFAP2A_LCL	0.061	0.726875
SMARCC1_all	0.061	0.726875
E2F1_K562	0.06	0.729034
MYBL2_K562	0.058	0.733414
wgEncodeUwDnaseHIPEpiCfdr01peakshg19	0.057	0.735635
wgEncodeDukeDnaseHeLaS3IFNa4hfdr01peakshg19	0.057	0.735635
RPC155_all	0.057	0.735635
wgEncodeBroadHistoneK562H4k20me1StdAln	0.056	0.737879
GTF2F1_all	0.055	0.740144
wgEncodeDukeDnaseUrotheliaUT189fdr01peakshg19	0.054	0.742433
TAL1_all	0.054	0.742433
GATA2_LCL	0.054	0.742433
MAZ_LCL	0.053	0.744745
GTF3C2_all	0.053	0.744745
ZBTB33_K562	0.052	0.747081
wgEncodeBroadHistoneHsmmH2azStdAln	0.052	0.747081
NANOG_all	0.052	0.747081
HDAC1_K562	0.052	0.747081
ZKSCAN1_all	0.05	0.75183
NFYA_K562	0.049	0.754243
MAFF_K562	0.049	0.754243
CTCFL_all	0.049	0.754243
BRCA1_all	0.049	0.754243
TFAP2A_K562	0.046	0.76165
BACH1_all	0.046	0.76165
ARID3A_K562	0.046	0.76165
wgEncodeUwDnaseRPTECfdr01peakshg19	0.044	0.766735
STAT1_LCL	0.044	0.766735
NFYB_LCL	0.044	0.766735
FOXA2_K562	0.044	0.766735
wgEncodeBroadHistoneK562H3k27me3StdAln	0.043	0.769325
TCF3_LCL	0.043	0.769325
PHF8_LCL	0.043	0.769325
IRF4_LCL	0.042	0.771948
HMGN3_K562	0.042	0.771948
CREB1_K562	0.042	0.771948
NR2C2_all	0.041	0.774605
POU5F1_all	0.04	0.777297
MAFK_LCL	0.04	0.777297
IRF1_LCL	0.04	0.777297
SP4_LCL	0.039	0.780026
RBBP5_LCL	0.039	0.780026
FOSL2_LCL	0.039	0.780026
SMARCB1_K562	0.038	0.782793
HNF4G_K562	0.038	0.782793
ESRRA_all	0.038	0.782793
wgEncodeUwDnaseSKNSHRAfdr01peakshg19	0.037	0.785599
ELK1_LCL	0.037	0.785599
E2F6_LCL	0.037	0.785599
SP2_K562	0.036	0.788447
RXRA_K562	0.036	0.788447
NFYB_K562	0.036	0.788447
FOXA1_LCL	0.036	0.788447
wgEncodeUwDnaseHNPCEpiCfdr01peakshg19	0.035	0.791337
CCNT2_K562	0.035	0.791337
ARID3A_LCL	0.035	0.791337
TRIM28_all	0.034	0.794271
SIN3A_LCL	0.034	0.794271
CBX3_LCL	0.033	0.797252
STAT2_K562	0.032	0.800282
SPI1_LCL	0.031	0.803362
HMGN3_all	0.031	0.803362
RPC155_K562	0.03	0.806496
NRF1_LCL	0.029	0.809685
MAFF_LCL	0.029	0.809685
FOXP2_K562	0.029	0.809685
wgEncodeUWDukeDnaseNHEKfdr01peakshg19	0.028	0.812934
wgEncodeUwDnaseHBMECfdr01peakshg19	0.028	0.812934
STAT2_all	0.028	0.812934
ZNF274_K562	0.027	0.816244
ZNF217_LCL	0.027	0.816244
wgEncodeUwDnaseHCPEpiCfdr01peakshg19	0.027	0.816244
SIN3AK20_all	0.027	0.816244
RUNX3_LCL	0.027	0.816244
CEBPD_LCL	0.027	0.816244
SP1_K562	0.026	0.819619
PPARGC1A_all	0.026	0.819619
ESRRA_LCL	0.026	0.819619
wgEncodeOpenChromFaireUrotsaPk	0.025	0.823063
FOXA2_LCL	0.025	0.823063
SAP30_LCL	0.024	0.826581
RXRA_LCL	0.024	0.826581
JUN_LCL	0.024	0.826581
BCLAF1_LCL	0.024	0.826581
E2F6_K562	0.023	0.830176
CBX3_K562	0.023	0.830176
RFX5_LCL	0.022	0.833854
PPARGC1A_LCL	0.022	0.833854
ZNF143_K562	0.021	0.83762
SMC3_K562	0.021	0.83762
PBX3_K562	0.021	0.83762
BATF_K562	0.021	0.83762
wgEncodeUwDnaseHMVECdNeofdr01peakshg19	0.02	0.841481
NFATC1_K562	0.02	0.841481
SUZ12_LCL	0.019	0.845443
NFE2_all	0.019	0.845443
ELK4_LCL	0.019	0.845443
CEBPD_K562	0.019	0.845443
PHF8_K562	0.018	0.849515
MEF2A_LCL	0.018	0.849515
ZZZ3_all	0.017	0.853707
ZEB1_LCL	0.017	0.853707
WRNIP1_K562	0.017	0.853707
SMARCC2_K562	0.017	0.853707
E2F4_all	0.017	0.853707
IKZF1_K562	0.016	0.858028
FOSL1_LCL	0.016	0.858028
BCL11A_LCL	0.016	0.858028
TAF7_LCL	0.015	0.86249
STAT1_K562	0.015	0.86249
SREBP1_K562	0.015	0.86249
IRF3_all	0.014	0.867109
CTCFL_LCL	0.014	0.867109
wgEncodeDukeDnaseMyometrfdr01peakshg19	0.013	0.8719
wgEncodeBroadHistoneGm12878H3k9me3StdAln	0.013	0.8719
STAT2_LCL	0.013	0.8719
SP2_all	0.013	0.8719
SMARCB1_LCL	0.013	0.8719
NFYA_LCL	0.013	0.8719
MYBL2_LCL	0.013	0.8719
MBD4_LCL	0.013	0.8719
JUNB_K562	0.013	0.8719
GTF2B_LCL	0.013	0.8719
BRF2_all	0.013	0.8719
wgEncodeOpenChromFairePanisletsPk	0.012	0.876885
SREBP1_all	0.012	0.876885
HNF4A_K562	0.012	0.876885
HDAC8_K562	0.012	0.876885
TAL1_K562	0.011	0.882087
JUNB_LCL	0.011	0.882087
HDAC1_LCL	0.011	0.882087
ZEB1_K562	0.01	0.887537
TFAP2C_LCL	0.01	0.887537
NR2C2_LCL	0.01	0.887537
NFYB_all	0.01	0.887537
NFE2_LCL	0.01	0.887537
FOSL1_K562	0.01	0.887537
CREB1_LCL	0.01	0.887537
BDP1_all	0.01	0.887537
wgEncodeBroadHistoneNhlfH3k4me1StdAln	0.009	0.893273
BRF2_LCL	0.009	0.893273
BACH1_K562	0.009	0.893273
ATF1_K562	0.009	0.893273
TRIM28_LCL	0.008	0.899343
SIRT6_all	0.008	0.899343
PML_LCL	0.008	0.899343
HNF4A_all	0.008	0.899343
GTF3C2_K562	0.008	0.899343
GRp20_all	0.008	0.899343
ELK4_K562	0.008	0.899343
NR2F2_K562	0.007	0.905813
JUN_K562	0.007	0.905813
IRF3_LCL	0.007	0.905813
IRF3_K562	0.007	0.905813
EGR1_LCL	0.007	0.905813
BACH1_LCL	0.007	0.905813
wgEncodeUwDnaseH7hESCfdr01peakshg19	0.006	0.912771
USF2_K562	0.006	0.912771
SMARCA4_K562	0.006	0.912771
NR2F2_all	0.006	0.912771
MEF2C_LCL	0.006	0.912771
HDAC6_all	0.006	0.912771
E2F4_LCL	0.006	0.912771
CTCFL_K562	0.006	0.912771
BRCA1_LCL	0.006	0.912771
wgEncodeUwDnaseAG09309fdr01peakshg19	0.005	0.920344
SRF_LCL	0.005	0.920344
POLR3G_all	0.005	0.920344
KDM5A_all	0.005	0.920344
HSF1_all	0.005	0.920344
GTF3C2_LCL	0.005	0.920344
ZNF274_LCL	0.004	0.92873
SIRT6_LCL	0.004	0.92873
HMGN3_LCL	0.004	0.92873
HDAC8_LCL	0.004	0.92873
CTBP2_K562	0.004	0.92873
CCNT2_all	0.004	0.92873
wgEncodeUwDnaseHPFfdr01peakshg19	0.003	0.938258
THAP1_K562	0.003	0.938258
SREBP1_LCL	0.003	0.938258
SIX5_LCL	0.003	0.938258
PRDM1_K562	0.003	0.938258
HDAC6_K562	0.003	0.938258
GTF2B_all	0.003	0.938258
BRF1_all	0.003	0.938258
wgEncodeDukeDnaseHPDE6E6E7fdr01peakshg19	0.002	0.949571
PBX3_LCL	0.002	0.949571
HSF1_K562	0.002	0.949571
GABPA_K562	0.002	0.949571
ESRRA_K562	0.002	0.949571
ZZZ3_K562	0.001	0.964329
ZKSCAN1_K562	0.001	0.964329
wgEncodeUwDnaseHAEpiCfdr01peakshg19	0.001	0.964329
SUZ12_K562	0.001	0.964329
SMARCA4_LCL	0.001	0.964329
POU5F1_K562	0.001	0.964329
NRF1_K562	0.001	0.964329
NR3C1_K562	0.001	0.964329
NR2C2_K562	0.001	0.964329
KDM5A_LCL	0.001	0.964329
HSF1_LCL	0.001	0.964329
ELF1_K562	0.001	0.964329
CREB1_all	0.001	0.964329
BDP1_LCL	0.001	0.964329
ZZZ3_LCL	0	1
ZKSCAN1_LCL	0	1
wgEncodeUwDnaseHMVECLBlfdr01peakshg19	0	1
wgEncodeOpenChromFaireAstrocyPk	0	1
wgEncodeBroadHistoneNhdfadH3k36me3StdAln	0	1
wgEncodeBroadHistoneHepg2H3k27me3StdAln	0	1
wgEncodeBroadHistoneH1hescH3k27me3StdAln	0	1
THAP1_LCL	0	1
TBP_K562	0	1
TAF1_LCL	0	1
SMARCC2_LCL	0	1
SIRT6_K562	0	1
RPC155_LCL	0	1
RDBP_K562	0	1
RBBP5_K562	0	1
PPARGC1A_K562	0	1
POLR3G_LCL	0	1
POLR3G_K562	0	1
NFE2_K562	0	1
NANOG_LCL	0	1
NANOG_K562	0	1
MAX_K562	0	1
KDM5A_K562	0	1
HDAC6_LCL	0	1
GTF2B_K562	0	1
GRp20_LCL	0	1
GRp20_K562	0	1
FAM48A_LCL	0	1
FAM48A_K562	0	1
ESR1_LCL	0	1
BRF2_K562	0	1
BRF1_LCL	0	1
BRF1_K562	0	1
BHLHE40_LCL	0	1
BDP1_K562	0	1
basic	0	1

## Sheet: RA
Dataset	llike.ratio	p value	Odds Ratio
wgEncodeBroadHistoneGm12878H3k4me1StdAln	30.69	4.70566e-15	2.48575
wgEncodeBroadHistoneGm12878H3k27acStdAln	22.39	2.20463e-11	2.45684
wgEncodeBroadHistoneGm12878H3k4me2StdAln	22.3	2.41692e-11	2.29021
wgEncodeOpenChromFaireGm18507Pk	17.33	3.92617e-09	2.71528
wgEncodeBroadHistoneGm12878H3k4me3StdAln	14.86	4.99172e-08	2.15091
RELA_all	14.66	6.13591e-08	3.04095
wgEncodeOpenChromFaireGm12892Pk	14.3	8.89822e-08	2.46626
wgEncodeBroadHistoneGm12878H2azStdAln	14.19	9.96899e-08	2.11985
wgEncodeOpenChromFaireGm19239Pk	13.95	1.2775e-07	2.47444
wgEncodeOpenChromFaireGm12891Pk	13.94	1.29077e-07	2.36128
Th1_H3K27ac_active_enhancers	12.46	5.97592e-07	1.88552
Th2_H3K27ac_active_enhancers	12.03	9.338e-07	1.86217
wgEncodeUwDnaseGM12864	10.76	3.50158e-06	2.73305
wgEncodeBroadHistoneGm12878H3k9acStdAln	10.59	4.18105e-06	2.00979
PML_all	9.89	8.68871e-06	2.85809
Birzele_merged_ChIP_Hs_Treg_FOXP3	9.37	1.49807e-05	3.21595
wgEncodeDukeDnaseUrotheliaUT189	8.54	3.58377e-05	2.25531
wgEncodeBroadHistoneGm12878H3k36me3StdAln	8.21	5.0747e-05	1.3656
TCF12_all	8.05	6.0084e-05	2.6387
FOXM1_all	7.24	0.000141656	2.87202
SPI1_all	7.01	0.000180876	2.54981
wgEncodeBroadHistoneGm12878H3k79me2StdAln	6.93	0.000196946	1.42774
IKZF1_all	6.47	0.000321635	3.16142
wgEncodeUwDnaseTh2	6.16	0.000448131	2.62886
wgEncodeDukeDnaseGM18507	5.9	0.000592307	2.39069
EBF1_all	5.89	0.000598705	2.39668
PAX5_all	5.76	0.000688514	2.66326
wgEncodeUwDnaseHAh	5.63	0.000791952	2.02694
wgEncodeBroadHistoneNhekH3k4me2StdAln	5.42	0.000993307	1.35945
ATF2_all	5.42	0.000993307	2.6362
NFIC_all	5.38	0.00103717	2.32735
POLR2A_all	5.31	0.00111871	1.62091
wgEncodeBroadHistoneHmecH3k4me1StdAln	5.16	0.00131596	1.25524
wgEncodeUwDnaseHBMEC	4.95	0.00165279	2.04491
wgEncodeBroadHistoneOsteoblH3k4me1StdAln	4.84	0.00186285	1.12215
RUNX3_all	4.73	0.00210001	2.16906
wgEncodeUWDukeDnaseHSMM	4.54	0.0025842	1.76281
wgEncodeUwDnaseBJ	4.43	0.00291488	2.19981
wgEncodeUwDnaseMonocytesCD14RO01746	4.38	0.00307909	2.14886
wgEncodeBroadHistoneNhaH3k4me1StdAln	4.38	0.00307909	1.21572
wgEncodeDukeDnaseTh0	4.34	0.00321721	1.97803
wgEncodeUwDnaseHFF	4.31	0.00332492	2.02481
EP300_all	4.22	0.00367056	1.81812
CTBP2_all	4.21	0.00371116	2.83895
wgEncodeBroadHistoneHuvecH3k36me3StdAln	4.18	0.00383571	1.12541
wgEncodeUwDnaseHPAF	4.15	0.00396451	2.01123
wgEncodeBroadHistoneH1hescH3k4me3StdAln	3.93	0.00505404	1.4315
wgEncodeDukeDnaseAoSMC	3.92	0.00511026	2.03588
wgEncodeBroadHistoneNhekH3k27acStdAln	3.89	0.00528278	1.30377
wgEncodeUwDnaseNHA	3.82	0.00570879	2.06492
wgEncodeDukeDnaseFibrobl	3.71	0.00645028	1.44281
wgEncodeUwDnaseHFFMyc	3.7	0.00652239	1.74955
wgEncodeUWDukeDnaseNHEK	3.62	0.0071297	1.7045
YY1_all	3.59	0.00737207	1.90051
MEF2A_all	3.46	0.0085237	2.74212
wgEncodeBroadHistoneNhaH3k4me3StdAln	3.38	0.00932238	1.36707
wgEncodeUwDnaseNHDFAd	3.18	0.0116722	1.70572
wgEncodeBroadHistoneNhekH3k4me1StdAln	3.18	0.0116722	1.00112
wgEncodeDukeDnaseGM19239	3.09	0.0129202	1.92736
wgEncodeBroadHistoneHsmmtH3k4me2StdAln	3.09	0.0129202	1.1941
wgEncodeBroadHistoneK562H3k27acStdAln	3	0.0143059	1.3468
MAZ_all	2.99	0.014469	1.85271
wgEncodeBroadHistoneOsteoblH3k36me3StdAln	2.95	0.0151409	0.887477
wgEncodeUwDnaseHMVECdLyAd	2.9	0.0160262	1.92405
ZEB1_all	2.87	0.0165828	2.98863
wgEncodeBroadHistoneH1hescH4k20me1StdAln	2.87	0.0165828	1.54811
wgEncodeBroadHistoneNhdfadH3k4me2StdAln	2.86	0.0167727	1.14702
wgEncodeUwDnaseGM12865	2.81	0.0177566	1.92204
wgEncodeBroadHistoneNhlfH3k4me1StdAln	2.74	0.0192353	1.14121
wgEncodeBroadHistoneNhekH3k9acStdAln	2.72	0.0196807	1.22185
POU2F2_all	2.72	0.0196807	2.27193
wgEncodeBroadHistoneHmecH3k4me2StdAln	2.69	0.0203689	1.11486
wgEncodeUwDnaseHMVECdNeo	2.67	0.0208415	1.84273
wgEncodeUwDnaseHAc	2.66	0.021082	1.93803
SP1_all	2.64	0.0215717	1.91082
wgEncodeBroadHistoneHelas3H4k20me1StdAln	2.55	0.0239258	1.59214
wgEncodeUwDnaseHMF	2.53	0.0244842	1.7126
MEF2C_all	2.53	0.0244842	2.94152
wgEncodeBroadHistoneHepg2H2azStdAln	2.5	0.0253473	1.47871
wgEncodeUwDnaseNHLF	2.4	0.0284597	1.76921
wgEncodeDukeDnaseGM19238	2.36	0.0298137	1.66124
wgEncodeBroadHistoneNhekH3k9me1StdAln	2.36	0.0298137	1.91393
GABPA_all	2.33	0.0308732	2.01531
wgEncodeBroadHistoneHelas3H3k36me3StdAln	2.31	0.0316012	0.973823
wgEncodeUwDnaseCMK	2.22	0.0351062	1.83878
wgEncodeUwDnaseHGF	2.17	0.0372269	1.66397
wgEncodeUwDnaseAG10803	2.15	0.0381124	1.65946
wgEncodeDukeDnaseGM19240	2.14	0.0385633	1.59647
wgEncodeBroadHistoneOsteoblH3k4me2StdAln	2.12	0.0394822	1.00062
SMARCC1_all	2.1	0.040424	2.55272
wgEncodeBroadHistoneHsmmH3k4me2StdAln	2.08	0.0413894	1.04063
T-bet_Th1_10-7-peaks	2.07	0.0418812	2.06361
wgEncodeBroadHistoneNhekH3k4me3StdAln	2.06	0.0423791	1.15775
wgEncodeUwDnaseHAsp	2.05	0.0428832	1.94915
wgEncodeUwDnaseHNPCEpiC	2.04	0.0433937	1.71334
wgEncodeBroadHistoneHepg2H4k20me1StdAln	2.02	0.0444338	1.16374
wgEncodeUwDnaseSKMC	2.01	0.0449637	1.59008
wgEncodeBroadHistoneH1hescH3k4me2StdAln	1.95	0.0482861	0.99845
wgEncodeBroadHistoneK562H3k36me3StdAln	1.91	0.0506442	0.889322
wgEncodeBroadHistoneK562H3k9acStdAln	1.89	0.0518687	1.11865
wgEncodeBroadHistoneGm12878H4k20me1StdAln	1.86	0.0537644	1.33503
wgEncodeUWDukeDnaseHSMMtube	1.85	0.0544125	1.27462
wgEncodeUwDnaseHRCEpiC	1.82	0.0564069	1.57722
TBP_all	1.81	0.0570889	1.55135
wgEncodeUwDnaseGM06990	1.78	0.0591877	1.99893
wgEncodeUwDnaseAG09319	1.77	0.0599055	1.75329
wgEncodeBroadHistoneHsmmtH3k4me1StdAln	1.77	0.0599055	0.876897
SRF_all	1.77	0.0599055	2.50032
wgEncodeBroadHistoneHuvecH3k4me2StdAln	1.76	0.0606324	0.957963
wgEncodeBroadHistoneK562H3k79me2StdAln	1.74	0.0621147	0.880083
wgEncodeUwDnaseHPdLF	1.72	0.0636357	1.52259
wgEncodeUwDnaseAG09309	1.7	0.0651964	1.57436
CREB1_all	1.7	0.0651964	2.26268
wgEncodeBroadHistoneHmecH3k27acStdAln	1.67	0.0676146	0.919612
wgEncodeBroadHistoneHmecH3k4me3StdAln	1.65	0.0692799	1.17632
wgEncodeBroadHistoneH1hescH3k9acStdAln	1.64	0.0701289	1.27565
wgEncodeBroadHistoneOsteoblH3k27acStdAln	1.63	0.0709891	0.822127
wgEncodeDukeDnaseProgFib	1.59	0.0745447	1.43585
BCLAF1_all	1.58	0.0754632	2.17729
wgEncodeUWDukeDnaseHUVEC	1.55	0.0782923	1.51461
wgEncodeBroadHistoneNhdfadH3k9acStdAln	1.51	0.0822435	1.15532
wgEncodeDukeDnaseHSMMemb	1.48	0.0853479	1.5488
wgEncodeBroadHistoneHsmmtH2azStdAln	1.47	0.0864107	1.02631
wgEncodeUwDnaseCD20	1.44	0.089686	1.60808
wgEncodeUwDnaseHL60	1.42	0.0919442	1.51757
wgEncodeBroadHistoneHuvecH3k4me3StdAln	1.4	0.0942643	1.08412
SMC3_all	1.4	0.0942643	1.45887
wgEncodeBroadHistoneNhekH4k20me1StdAln	1.37	0.0978648	1.15098
SMARCB1_all	1.37	0.0978648	2.01415
wgEncodeBroadHistoneH1hescH3k27acStdAln	1.36	0.099098	1.22086
BCL3_all	1.36	0.099098	2.12721
wgEncodeOpenChromFaireHelas3Pk	1.35	0.100348	1.44329
wgEncodeBroadHistoneH1hescH3k27me3StdAln	1.35	0.100348	0.94911
SREBP1_all	1.35	0.100348	3.25167
NANOG_all	1.32	0.104204	3.16333
ZKSCAN1_all	1.31	0.105524	2.59588
wgEncodeDukeDnaseGM12892	1.3	0.106864	1.28569
wgEncodeBroadHistoneNhekH3k36me3StdAln	1.3	0.106864	0.806385
wgEncodeBroadHistoneNhdfadH3k27acStdAln	1.29	0.108222	0.852022
wgEncodeBroadHistoneGm12878H3k27me3StdAln	1.29	0.108222	0.906468
IRF4_all	1.29	0.108222	2.18085
wgEncodeDukeDnaseiPS	1.24	0.115302
wgEncodeBroadHistoneGm12878H3k9me3StdAln	1.24	0.115302	0.889646
wgEncodeUwDnaseAG04449	1.23	0.116779	1.64591
wgEncodeBroadHistoneHsmmtH3k9acStdAln	1.23	0.116779	0.837866
TAF1_all	1.22	0.118276	1.39383
wgEncodeUwDnaseSAEC	1.2	0.121335	1.24403
BATF_all	1.2	0.121335	2.35612
GATA3_Th2	1.2	0.121335	2.41143
MAX_all	1.18	0.124482	1.229
SIX5_all	1.16	0.12772	2.35661
wgEncodeBroadHistoneHsmmH3k4me1StdAln	1.13	0.132754	0.776009
NR2C2_all	1.13	0.132754	2.39169
wgEncodeDukeDnaseH9ES	1.12	0.134481	1.3176
wgEncodeBroadHistoneHsmmH2azStdAln	1.12	0.134481	0.947758
GATA3_all	1.12	0.134481	1.65744
wgEncodeUwDnaseHEEpiC	1.08	0.141645	1.16683
wgEncodeBroadHistoneHuvecH3k4me1StdAln	1.08	0.141645	0.730696
wgEncodeOpenChromFaireNhekPk	1.03	0.15121	1.39216
wgEncodeUwDnaseHRPEpiC	1.02	0.15321	1.33085
SIN3A_all	1.02	0.15321	1.32055
REST_all	1.01	0.155239	1.29415
wgEncodeUwDnaseHMVECdBlNeo	1	0.157299	1.23845
wgEncodeBroadHistoneHmecH3k9acStdAln	1	0.157299	1.0049
MYBL2_all	0.98	0.161513	1.59054
wgEncodeDukeDnaseHTR8svn	0.97	0.163669	1.38771
TAF7_all	0.97	0.163669	2.01167
MTA3_all	0.97	0.163669	2.07891
wgEncodeDukeDnasePanIsletD	0.96	0.165857	1.31346
wgEncodeDukeDnasePanIslets	0.95	0.168078	1.11978
MXI1_all	0.95	0.168078	1.41363
IRF1_all	0.95	0.168078	1.6299
wgEncodeOpenChromFaireNhbePk	0.94	0.170334
wgEncodeBroadHistoneHelas3H3k79me2StdAln	0.94	0.170334	0.651824
wgEncodeUwDnaseHIPEpiC	0.93	0.172625	1.26853
MYC_all	0.93	0.172625	1.14019
ETS1_all	0.89	0.182149	1.63212
wgEncodeUWDukeDnaseGM12878	0.87	0.187139	1.28454
ELK1_all	0.87	0.187139	1.92158
CTCF_all	0.87	0.187139	1.00123
ZBTB33_all	0.86	0.189693	1.88934
wgEncodeBroadHistoneNhaH3k27me3StdAln	0.86	0.189693	0.698855
SIN3AK20_all	0.85	0.192288	1.35531
ELK4_all	0.84	0.194924	1.99319
EZH2_all	0.82	0.200325	1.25007
wgEncodeBroadHistoneNhlfH3k27acStdAln	0.81	0.203092	0.759107
wgEncodeUwDnaseHCPEpiC	0.8	0.205903	1.18005
ELF1_all	0.8	0.205903	1.32043
E2F4_all	0.8	0.205903	1.60906
wgEncodeBroadHistoneNhlfH3k4me3StdAln	0.78	0.211665	0.908468
FOSL1_all	0.78	0.211665	2.26776
wgEncodeBroadHistoneK562H3k27me3StdAln	0.76	0.217619	0.691435
wgEncodeOpenChromFaireA549Pk	0.75	0.220671	1.71846
wgEncodeBroadHistoneNhdfadH3k4me3StdAln	0.75	0.220671	0.867191
wgEncodeBroadHistoneHsmmH3k36me3StdAln	0.75	0.220671	0.551341
wgEncodeOpenChromFaireK562NabutPk	0.74	0.223775	1.34267
WRNIP1_all	0.73	0.22693	1.62331
wgEncodeBroadHistoneHsmmtH3k4me3StdAln	0.73	0.22693	0.806511
GATA2_all	0.73	0.22693
wgEncodeUwDnaseHCFaa	0.72	0.230139	1.24384
wgEncodeBroadHistoneNhlfH3k36me3StdAln	0.72	0.230139	0.621223
wgEncodeBroadHistoneHuvecH3k27me3StdAln	0.72	0.230139	0.495509
wgEncodeDukeDnaseStellate	0.71	0.233403	1.17778
wgEncodeBroadHistoneHepg2H3k79me2StdAln	0.71	0.233403	0.630062
wgEncodeUwDnaseHRE	0.7	0.236724	1.21724
CHD1_all	0.7	0.236724	1.43802
BRCA1_all	0.7	0.236724	1.79372
wgEncodeUWDukeDnaseTh1	0.67	0.247034	0.980742
wgEncodeUwDnaseHPF	0.67	0.247034	1.20152
wgEncodeBroadHistoneHepg2H3k27acStdAln	0.67	0.247034	0.695844
Th1.Dnase.UW	0.67	0.247034	0.980742
STAT3_all	0.66	0.250592	1.16097
wgEncodeUwDnaseCaco2	0.65	0.254213	1.20258
wgEncodeUwDnaseNHDFneo	0.61	0.269361	1.10549
wgEncodeUwDnaseNB4	0.61	0.269361	1.19703
wgEncodeBroadHistoneNhlfH3k27me3StdAln	0.61	0.269361	0.567925
wgEncodeBroadHistoneHmecH3k27me3StdAln	0.61	0.269361	0.909672
wgEncodeBroadHistoneHuvecH3k27acStdAln	0.59	0.277356	0.643192
wgEncodeBroadHistoneHsmmH3k4me3StdAln	0.59	0.277356	0.770718
CHD2_all	0.59	0.277356	1.27094
wgEncodeOpenChromFaireK562OhureaPk	0.57	0.285652
wgEncodeBroadHistoneNhlfH3k4me2StdAln	0.57	0.285652	0.65936
wgEncodeBroadHistoneOsteoblH2azStdAln	0.56	0.289918	0.651862
USF1_all	0.56	0.289918	1.15235
wgEncodeUWDukeDnaseH1hESC	0.55	0.294266	1.0193
wgEncodeBroadHistoneHsmmtH3k27acStdAln	0.55	0.294266	0.525515
wgEncodeUwDnasePANC1	0.54	0.298698	1.19146
wgEncodeBroadHistoneK562H3k4me1StdAln	0.54	0.298698	0.495449
wgEncodeUwDnaseSKNSHRA	0.51	0.312519
wgEncodeOpenChromFaireH1hescPk	0.51	0.312519	1.19289
wgEncodeDukeDnaseOsteobl	0.51	0.312519	0.72113
wgEncodeBroadHistoneK562H3k4me2StdAln	0.51	0.312519	0.653783
wgEncodeUwDnaseAoAF	0.49	0.322199	1.03887
ZNF263_all	0.48	0.327187
PBX3_all	0.48	0.327187	1.90791
wgEncodeDukeDnaseHPDE6E6E7	0.47	0.332278	1.06809
wgEncodeUwDnaseCD34Mobilized	0.46	0.337475	1.01421
wgEncodeBroadHistoneHsmmH3k9me3StdAln	0.46	0.337475
TBL1XR1_all	0.46	0.337475	1.08081
wgEncodeUwDnaseWERIRb1	0.45	0.342782	0.877285
wgEncodeUwDnaseHMVECLLy	0.45	0.342782	1.09843
wgEncodeOpenChromFaireUrotsaPk	0.45	0.342782
wgEncodeOpenChromFaireAstrocyPk	0.45	0.342782	1.36839
wgEncodeBroadHistoneHepg2H3k27me3StdAln	0.45	0.342782	0.384085
CEBPB_all	0.45	0.342782	1.03946
TFAP2C_all	0.43	0.353739
NR2F2_all	0.42	0.359397
wgEncodeBroadHistoneHepg2H3k9acStdAln	0.41	0.36518	0.571607
wgEncodeBroadHistoneHelas3H3k27acStdAln	0.41	0.36518	0.491094
wgEncodeBroadHistoneHepg2H3k4me2StdAln	0.4	0.371093	0.483554
wgEncodeBroadHistoneHelas3H3k9acStdAln	0.4	0.371093	0.642586
Hawkins_TableS2a_Th1_enhancers	0.4	0.371093	1.42709
wgEncodeBroadHistoneNhdfadH3k36me3StdAln	0.39	0.377141
wgEncodeBroadHistoneK562H3k9me3StdAln	0.39	0.377141
wgEncodeBroadHistoneNhdfadH3k27me3StdAln	0.38	0.383329	0.42597
wgEncodeUwDnaseHVMF	0.37	0.389661	0.929137
wgEncodeBroadHistoneOsteoblH3k9me3StdAln	0.37	0.389661
RFX5_all	0.37	0.389661	1.08579
RAD21_all	0.37	0.389661	0.876701
wgEncodeUwDnaseH7hESC	0.36	0.396144	0.874845
wgEncodeBroadHistoneHsmmH3k9acStdAln	0.36	0.396144	0.671835
wgEncodeUwDnaseAG04450	0.35	0.402784	1.11301
wgEncodeBroadHistoneNhaH3k27acStdAln	0.35	0.402784	0.529424
HDAC1_all	0.35	0.402784	1.24227
BACH1_all	0.34	0.409587	1.55493
wgEncodeDukeDnaseMyometr	0.32	0.423711	0.930156
USF2_all	0.32	0.423711
GTF2F1_all	0.32	0.423711	1.12914
wgEncodeUWDukeDnaseHMEC	0.31	0.431047	0.586412
wgEncodeOpenChromFaireHelas3Ifna4hPk	0.31	0.431047	0.612877
TFAP2A_all	0.31	0.431047
wgEncodeOpenChromFaireGlioblaPk	0.3	0.438578
wgEncodeBroadHistoneNhlfH4k20me1StdAln	0.3	0.438578
NFATC1_all	0.3	0.438578	1.55699
wgEncodeUWDukeDnaseLNCaP	0.29	0.446312	0.803386
wgEncodeUwDnaseHMVECLBl	0.29	0.446312	0.898278
wgEncodeBroadHistoneHuvecH3k9acStdAln	0.29	0.446312	0.525816
BHLHE40_all	0.29	0.446312	0.846276
wgEncodeOpenChromFairePanisletsPk	0.28	0.45426
wgEncodeDukeDnaseLNCaPAndrogen	0.28	0.45426
wgEncodeBroadHistoneHsmmH4k20me1StdAln	0.28	0.45426	0.606046
RBBP5_all	0.28	0.45426	0.909313
NFYB_all	0.28	0.45426	1.44198
wgEncodeUwDnaseHMVECdLyNeo	0.27	0.462433
wgEncodeDukeDnaseHepatocytes	0.26	0.470842	0.72125
wgEncodeOpenChromFaireHepg2Pk	0.25	0.4795	0.823141
wgEncodeBroadHistoneNhaH3k36me3StdAln	0.25	0.4795	0.405579
NR3C1_all	0.25	0.4795	1.25557
wgEncodeUwDnaseHMVECdAd	0.23	0.497624
wgEncodeUwDnaseBE2C	0.23	0.497624
JUNB_all	0.23	0.497624
wgEncodeUwDnaseJurkat	0.22	0.507122
wgEncodeDukeDnaseHuh7.5	0.22	0.507122
wgEncodeDukeDnaseGM12891	0.21	0.516937
wgEncodeBroadHistoneNhlfH3k9acStdAln	0.21	0.516937
ZBTB7A_all	0.2	0.527089
wgEncodeUwDnaseHPAEC	0.2	0.527089
wgEncodeBroadHistoneHsmmtH3k36me3StdAln	0.2	0.527089
ATF1_all	0.2	0.527089
wgEncodeUwDnaseSKNMC	0.19	0.537603
wgEncodeBroadHistoneNhekH3k27me3StdAln	0.19	0.537603
wgEncodeBroadHistoneHelas3H3k4me2StdAln	0.19	0.537603
STAT1_all	0.19	0.537603
wgEncodeBroadHistoneHelas3H3k4me3StdAln	0.18	0.548506
SAP30_all	0.18	0.548506
PHF8_all	0.18	0.548506
MAFF_all	0.18	0.548506
JUND_all	0.18	0.548506
wgEncodeBroadHistoneK562H3k4me3StdAln	0.17	0.559829
wgEncodeBroadHistoneHsmmtH4k20me1StdAln	0.17	0.559829
KDM5B_all	0.17	0.559829
wgEncodeUWDukeDnaseA549	0.16	0.571608
wgEncodeBroadHistoneHsmmH3k79me2StdAln	0.16	0.571608
wgEncodeBroadHistoneHmecH4k20me1StdAln	0.16	0.571608
TCF7L2_all	0.16	0.571608
SMARCA4_all	0.16	0.571608
E2F6_all	0.16	0.571608
wgEncodeOpenChromFaireHuvecPk	0.14	0.596701
wgEncodeBroadHistoneH1hescH3k36me3StdAln	0.14	0.596701
THAP1_all	0.14	0.596701
NFYA_all	0.14	0.596701
FOS_all	0.14	0.596701
ZNF274_all	0.13	0.61012
wgEncodeUwDnaseHCM	0.13	0.61012
wgEncodeDukeDnaseCLL	0.13	0.61012
wgEncodeBroadHistoneHepg2H3k36me3StdAln	0.13	0.61012
STAT2_all	0.13	0.61012
EGR1_all	0.13	0.61012
CBX3_all	0.13	0.61012
GATA3_Th1	0.13	0.61012
wgEncodeUwDnaseHCF	0.12	0.624206
wgEncodeBroadHistoneH1hescH3k4me1StdAln	0.12	0.624206
TEAD4_all	0.12	0.624206
SP2_all	0.12	0.624206
ZNF143_all	0.11	0.63904
wgEncodeOpenChromFaireUrotsaUt189Pk	0.11	0.63904
GTF3C2_all	0.11	0.63904
FOSL2_all	0.11	0.63904
wgEncodeUWDukeDnaseHepG2	0.1	0.654721
wgEncodeUwDnasePrEC	0.1	0.654721
wgEncodeUwDnaseHRGEC	0.1	0.654721
wgEncodeDukeDnaseFibroP	0.1	0.654721
HSF1_all	0.1	0.654721
ESR1_all	0.1	0.654721
TAL1_all	0.09	0.671373
SP4_all	0.09	0.671373
CCNT2_all	0.09	0.671373
wgEncodeUWDukeDnaseHeLaS3	0.08	0.689157
RPC155_all	0.08	0.689157
HDAC8_all	0.08	0.689157
CTCFL_all	0.08	0.689157
CEBPD_all	0.08	0.689157
wgEncodeUwDnaseHConF	0.07	0.708281
wgEncodeOpenChromFaireHtr8Pk	0.07	0.708281
wgEncodeDukeDnaseUrothelia	0.07	0.708281
wgEncodeBroadHistoneHuvecH4k20me1StdAln	0.07	0.708281
TRIM28_all	0.07	0.708281
TCF3_all	0.07	0.708281
SMARCC2_all	0.07	0.708281
SIRT6_all	0.07	0.708281
RXRA_all	0.07	0.708281
PRDM1_all	0.07	0.708281
NRF1_all	0.07	0.708281
NFKB_binding_regions	0.07	0.708281
wgEncodeBroadHistoneHmecH3k36me3StdAln	0.06	0.729034
IRF3_all	0.06	0.729034
FOXA1_all	0.06	0.729034
E2F1_all	0.06	0.729034
wgEncodeUWDukeDnaseK562	0.05	0.75183
wgEncodeDukeDnaseMelano	0.05	0.75183
wgEncodeBroadHistoneK562H2azStdAln	0.05	0.75183
wgEncodeBroadHistoneHsmmH3k27acStdAln	0.05	0.75183
GTF2B_all	0.05	0.75183
wgEncodeDukeDnaseT47D	0.04	0.777297
wgEncodeDukeDnaseRWPE1	0.04	0.777297
wgEncodeDukeDnasepHTE	0.04	0.777297
UBTF_all	0.04	0.777297
NFE2_all	0.04	0.777297
FOXA2_all	0.04	0.777297
wgEncodeOpenChromFaireK562Pk	0.03	0.806496
wgEncodeDukeDnaseIshikawaTamoxifen	0.03	0.806496
wgEncodeBroadHistoneHepg2H3k4me3StdAln	0.03	0.806496
SUZ12_all	0.03	0.806496
SETDB1_all	0.03	0.806496
RDBP_all	0.03	0.806496
PPARGC1A_all	0.03	0.806496
POLR3G_all	0.03	0.806496
HMGN3_all	0.03	0.806496
FAM48A_all	0.03	0.806496
ZZZ3_all	0.02	0.841481
wgEncodeUwDnaseWI38TamoxifenTamoxifen	0.02	0.841481
wgEncodeUwDnaseWI38	0.02	0.841481
wgEncodeUwDnaseRPTEC	0.02	0.841481
wgEncodeUwDnaseHCT116	0.02	0.841481
wgEncodeOpenChromFaireMedulloPk	0.02	0.841481
wgEncodeDukeDnaseHuh7	0.02	0.841481
wgEncodeDukeDnase8988T	0.02	0.841481
wgEncodeBroadHistoneHsmmtH3k79me2StdAln	0.02	0.841481
wgEncodeBroadHistoneHsmmH3k27me3StdAln	0.02	0.841481
wgEncodeBroadHistoneHelas3H3k27me3StdAln	0.02	0.841481
STAT5A_all	0.02	0.841481
JUN_all	0.02	0.841481
HNF4G_all	0.02	0.841481
HNF4A_all	0.02	0.841481
ESRRA_all	0.02	0.841481
BRF2_all	0.02	0.841481
BDP1_all	0.02	0.841481
BCL11A_all	0.02	0.841481
wgEncodeUWDukeDnaseMCF7	0.01	0.887537
wgEncodeUwDnaseHMVECdBlAd	0.01	0.887537
wgEncodeUwDnaseHAEpiC	0.01	0.887537
wgEncodeOpenChromFaireHelas3Ifng4hPk	0.01	0.887537
wgEncodeDukeDnaseMCF7Hypoxia	0.01	0.887537
wgEncodeDukeDnaseGliobla	0.01	0.887537
wgEncodeDukeDnaseChorion	0.01	0.887537
wgEncodeBroadHistoneK562H4k20me1StdAln	0.01	0.887537
RCOR1_all	0.01	0.887537
POU5F1_all	0.01	0.887537
HDAC6_all	0.01	0.887537
HDAC2_all	0.01	0.887537
FOXP2_all	0.01	0.887537
ZNF217_all	0	1
wgEncodeUwDnaseNT2D1	0	1
wgEncodeDukeDnaseMedullo	0	1
wgEncodeDukeDnaseIshikawaEstradiol	0	1
wgEncodeDukeDnaseHeLaS3IFNa4h	0	1
MBD4_all	0	1
KAP1_all	0	1
GRp20_all	0	1
GATA1_all	0	1
BRF1_all	0	1
ATF3_all	0	1
wgEncodeOpenChromFaireGm12878Pk
KDM5A_all

## Sheet: Psoriasis
Dataset	llike.ratio	p value	Odds Ratio
POLR2A_all	9.25	1.69904e-05	1.60253
wgEncodeBroadHistoneGm12878H3k4me2StdAln	7.82	7.66166e-05	1.40165
ETS1_all	6.73	0.000243704	2.87993
wgEncodeBroadHistoneHuvecH3k36me3StdAln	6.4	0.000346619	1.29756
wgEncodeUwDnaseNHLF	5.8	0.000659518	2.05894
wgEncodeUwDnaseHNPCEpiC	5.67	0.000758553	2.0248
IRF3_all	5.5	0.000911119	4.27007
wgEncodeBroadHistoneHuvecH3k27acStdAln	5.45	0.000961643	1.31508
wgEncodeUwDnaseHBMEC	5.27	0.00116818	1.96561
wgEncodeBroadHistoneHepg2H3k9acStdAln	5.19	0.00127388	1.38099
wgEncodeOpenChromFaireGm19239Pk	4.99	0.0015825	1.65565
wgEncodeBroadHistoneOsteoblH3k36me3StdAln	4.93	0.00168911	1.02414
wgEncodeBroadHistoneGm12878H3k9acStdAln	4.93	0.00168911	1.34721
wgEncodeBroadHistoneHsmmtH3k4me2StdAln	4.83	0.00188324	1.22851
wgEncodeUwDnaseHCPEpiC	4.67	0.00224206	1.94742
ZBTB33_all	4.63	0.00234213	2.83735
wgEncodeDukeDnaseHuh7	4.59	0.00244674	1.86662
wgEncodeUwDnaseHPdLF	4.58	0.00247363	2.00818
wgEncodeBroadHistoneNhdfadH3k36me3StdAln	4.49	0.00272951	1.13805
wgEncodeBroadHistoneNhekH3k27acStdAln	4.48	0.00275955	1.20802
FOS_all	4.43	0.00291488	1.58189
wgEncodeBroadHistoneH1hescH3k9acStdAln	4.36	0.00314738	1.59513
wgEncodeBroadHistoneGm12878H3k79me2StdAln	4.36	0.00314738	1.13598
wgEncodeBroadHistoneGm12878H3k4me1StdAln	4.34	0.00321721	1.06793
wgEncodeBroadHistoneNhekH3k9acStdAln	4.31	0.00332492	1.27864
wgEncodeBroadHistoneHepg2H3k4me2StdAln	4.31	0.00332492	1.10675
wgEncodeUwDnaseHFF	4.29	0.00339875	1.90968
wgEncodeUwDnaseAoAF	4.25	0.00355146	1.96522
MYC_all	4.14	0.00400841	1.74192
wgEncodeBroadHistoneNhekH3k4me3StdAln	4.09	0.00423548	1.31943
wgEncodeBroadHistoneH1hescH3k4me3StdAln	4.03	0.00452532	1.36233
wgEncodeBroadHistoneH1hescH3k4me2StdAln	4.02	0.00457555	1.19438
wgEncodeBroadHistoneHuvecH3k4me1StdAln	3.97	0.00483538	0.999225
wgEncodeBroadHistoneHepg2H2azStdAln	3.95	0.00494348	1.45851
wgEncodeBroadHistoneGm12878H3k36me3StdAln	3.95	0.00494348	0.991416
NFIC_all	3.87	0.00540108	1.93053
ZNF143_all	3.85	0.00552208	2.0789
wgEncodeBroadHistoneNhekH3k9me1StdAln	3.8	0.00583683	2.06912
wgEncodeUwDnaseHPF	3.79	0.00590194	1.95714
RCOR1_all	3.67	0.00674368	1.95353
wgEncodeUwDnaseHMF	3.64	0.00697265	1.83662
wgEncodeBroadHistoneNhdfadH3k4me3StdAln	3.49	0.00824256	1.32274
wgEncodeBroadHistoneH1hescH3k27acStdAln	3.48	0.0083352	1.47357
WRNIP1_all	3.47	0.00842891	2.29767
wgEncodeBroadHistoneHelas3H3k4me3StdAln	3.45	0.00861957	1.12403
wgEncodeBroadHistoneK562H3k4me2StdAln	3.43	0.00881465	1.17494
wgEncodeBroadHistoneHsmmtH3k4me3StdAln	3.39	0.00921849	1.27065
wgEncodeBroadHistoneNhaH3k36me3StdAln	3.33	0.00986009	1.0576
wgEncodeUwDnaseHRPEpiC	3.27	0.0105475	1.72767
wgEncodeUwDnaseSAEC	3.26	0.0106668	1.60327
wgEncodeBroadHistoneGm12878H3k4me3StdAln	3.24	0.0109095	1.09429
wgEncodeBroadHistoneHepg2H3k4me3StdAln	3.22	0.0111579	1.17309
wgEncodeUwDnaseHAc	3.21	0.0112842	1.81139
wgEncodeBroadHistoneNhekH3k4me2StdAln	3.21	0.0112842	0.976808
wgEncodeUwDnaseNHA	3.2	0.011412	1.79054
wgEncodeBroadHistoneHepg2H3k79me2StdAln	3.14	0.0122108	1.01303
SIN3A_all	3.12	0.0124896	1.67782
wgEncodeBroadHistoneK562H3k27acStdAln	3.11	0.0126315	1.15754
SP2_all	3.09	0.0129202	3.26551
wgEncodeOpenChromFaireHuvecPk	3.07	0.0132157	1.34635
wgEncodeBroadHistoneHsmmH3k36me3StdAln	3.02	0.0139853	0.9612
wgEncodeBroadHistoneHmecH3k9acStdAln	3	0.0143059	1.26801
wgEncodeUwDnaseHL60	2.97	0.014801	1.59061
wgEncodeBroadHistoneNhlfH3k4me2StdAln	2.97	0.014801	1.01481
wgEncodeBroadHistoneHmecH3k36me3StdAln	2.97	0.014801	1.26573
wgEncodeBroadHistoneHsmmtH3k36me3StdAln	2.95	0.0151409	0.903035
wgEncodeUwDnaseCMK	2.91	0.0158449	1.71047
wgEncodeUwDnaseTh2	2.9	0.0160262	1.93612
wgEncodeOpenChromFaireA549Pk	2.89	0.0162095	2.15402
SIN3AK20_all	2.89	0.0162095	1.80257
wgEncodeBroadHistoneK562H2azStdAln	2.87	0.0165828	1.01534
wgEncodeBroadHistoneK562H3k4me1StdAln	2.75	0.0190165	0.89477
wgEncodeBroadHistoneK562H3k9acStdAln	2.74	0.0192353	1.12141
YY1_all	2.72	0.0196807	1.66139
wgEncodeBroadHistoneGm12878H2azStdAln	2.72	0.0196807	1.06776
wgEncodeBroadHistoneGm12878H3k27acStdAln	2.71	0.0199074	0.981593
wgEncodeUwDnaseAG09309	2.7	0.0201368	1.66432
wgEncodeDukeDnaseH9ES	2.7	0.0201368	1.47548
wgEncodeBroadHistoneHmecH3k4me3StdAln	2.7	0.0201368	1.21393
wgEncodeBroadHistoneHelas3H3k4me2StdAln	2.7	0.0201368	0.944289
wgEncodeUwDnaseHMVECLBl	2.69	0.0203689	1.60482
wgEncodeUwDnaseCD34Mobilized	2.67	0.0208415	1.68318
wgEncodeBroadHistoneNhdfadH3k27acStdAln	2.67	0.0208415	1.03914
SPI1_all	2.67	0.0208415	1.90992
FOXM1_all	2.67	0.0208415	2.17299
wgEncodeUwDnaseHGF	2.62	0.0220733	1.78417
wgEncodeBroadHistoneH1hescH3k27me3StdAln	2.62	0.0220733
TCF12_all	2.58	0.0231129	1.95709
RELA_all	2.58	0.0231129	1.78223
BCLAF1_all	2.58	0.0231129	2.47526
wgEncodeUwDnaseSKNMC	2.54	0.0242034	1.87519
wgEncodeUwDnaseAG09319	2.54	0.0242034	1.76169
wgEncodeOpenChromFaireGm18507Pk	2.54	0.0242034	1.36027
wgEncodeUWDukeDnaseLNCaP	2.53	0.0244842	1.30992
wgEncodeBroadHistoneNhdfadH3k9acStdAln	2.52	0.0247685	1.17875
ATF2_all	2.51	0.0250562	1.94354
wgEncodeUWDukeDnaseTh1	2.5	0.0253473	1.31017
Th1.Dnase.UW	2.5	0.0253473	1.31017
RUNX3_all	2.48	0.0259402	1.75313
wgEncodeUwDnaseHPAF	2.46	0.0265475	1.60385
wgEncodeOpenChromFaireGm12878Pk	2.43	0.0274863	1.91483
wgEncodeBroadHistoneNhlfH3k4me3StdAln	2.41	0.0281313	1.16208
wgEncodeBroadHistoneHmecH3k4me1StdAln	2.41	0.0281313	0.804395
wgEncodeBroadHistoneHuvecH3k4me2StdAln	2.4	0.0284597	0.907821
wgEncodeBroadHistoneHelas3H3k36me3StdAln	2.39	0.0287921	0.92993
wgEncodeBroadHistoneNhlfH3k27acStdAln	2.37	0.0294691	0.957389
wgEncodeUwDnaseHConF	2.33	0.0308732	1.65936
wgEncodeBroadHistoneK562H3k79me2StdAln	2.29	0.0323472	0.908506
wgEncodeBroadHistoneH1hescH3k36me3StdAln	2.27	0.0331116	1.094
HSF1_all	2.24	0.0342937	3.24906
wgEncodeOpenChromFaireGm12892Pk	2.23	0.0346975	1.26072
wgEncodeUwDnaseHIPEpiC	2.22	0.0351062	1.61058
wgEncodeBroadHistoneHelas3H3k9acStdAln	2.22	0.0351062	0.997595
wgEncodeUwDnaseHEEpiC	2.19	0.036363	1.41428
wgEncodeBroadHistoneHsmmH3k4me2StdAln	2.19	0.036363	0.92306
wgEncodeOpenChromFaireK562Pk	2.16	0.0376669	1.39326
TBL1XR1_all	2.16	0.0376669	1.96252
wgEncodeUwDnaseHRE	2.15	0.0381124	1.53648
wgEncodeUwDnaseHMVECdBlAd	2.12	0.0394822	1.43095
wgEncodeUWDukeDnaseHSMM	2.11	0.0399502	1.30254
wgEncodeUWDukeDnaseHMEC	2.11	0.0399502	1.19021
wgEncodeUwDnaseSKMC	2.11	0.0399502	1.588
STAT3_all	2.05	0.0428832	1.42838
wgEncodeDukeDnaseHPDE6E6E7	2.04	0.0433937	1.57242
wgEncodeBroadHistoneOsteoblH3k27acStdAln	2.04	0.0433937	0.759895
wgEncodeUwDnaseAG04450	1.99	0.0460436	1.7298
wgEncodeBroadHistoneHsmmtH3k4me1StdAln	1.97	0.0471508	0.814129
wgEncodeUwDnaseWERIRb1	1.95	0.0482861	1.35608
wgEncodeUwDnaseHMVECdBlNeo	1.91	0.0506442	1.36075
wgEncodeBroadHistoneNhlfH3k36me3StdAln	1.88	0.0524926	0.843762
wgEncodeBroadHistoneHsmmtH3k79me2StdAln	1.87	0.0531244	0.758311
TBP_all	1.87	0.0531244	1.33103
wgEncodeUwDnaseGM06990	1.85	0.0544125	1.70736
STAT1_all	1.85	0.0544125	1.88286
wgEncodeUWDukeDnaseHSMMtube	1.83	0.0557336	1.24385
wgEncodeUwDnaseHFFMyc	1.82	0.0564069	1.42791
wgEncodeBroadHistoneHsmmtH3k27acStdAln	1.81	0.0570889	0.767737
GTF2F1_all	1.77	0.0599055	2.00178
wgEncodeUwDnaseNB4	1.76	0.0606324	1.56524
wgEncodeUwDnaseHMVECLLy	1.75	0.0613688	1.43157
wgEncodeBroadHistoneNhaH3k27acStdAln	1.74	0.0621147	0.866611
wgEncodeBroadHistoneOsteoblH3k4me2StdAln	1.73	0.0628703	0.746601
wgEncodeBroadHistoneK562H3k36me3StdAln	1.73	0.0628703	0.786364
wgEncodeUwDnaseSKNSHRA	1.71	0.064411	1.80782
wgEncodeUwDnasePrEC	1.7	0.0651964	1.35348
wgEncodeBroadHistoneHsmmH3k9acStdAln	1.7	0.0651964	1.09506
RFX5_all	1.69	0.0659921	1.57231
wgEncodeBroadHistoneNhekH3k36me3StdAln	1.67	0.0676146	0.781738
wgEncodeBroadHistoneHsmmH3k4me1StdAln	1.65	0.0692799	0.801211
wgEncodeBroadHistoneHelas3H3k79me2StdAln	1.65	0.0692799	0.737901
wgEncodeDukeDnaseStellate	1.63	0.0709891	1.45949
wgEncodeBroadHistoneHmecH3k4me2StdAln	1.63	0.0709891	0.797831
POU2F2_all	1.59	0.0745447	1.84404
MAX_all	1.59	0.0745447	1.24639
wgEncodeUwDnaseAG10803	1.58	0.0754632	1.42707
ELF1_all	1.57	0.0763938	1.60533
wgEncodeDukeDnaseGM19239	1.56	0.0773368	1.53023
wgEncodeDukeDnaseTh0	1.55	0.0782923	1.18507
wgEncodeUWDukeDnaseH1hESC	1.54	0.0792605
E2F1_all	1.54	0.0792605	1.54814
wgEncodeDukeDnaseFibroP	1.53	0.0802417	1.28357
wgEncodeDukeDnaseAoSMC	1.51	0.0822435	1.47168
ELK1_all	1.51	0.0822435	2.22625
BRF1_all	1.5	0.0832645	3.05913
wgEncodeBroadHistoneHsmmtH2azStdAln	1.49	0.0842993	0.895735
BRCA1_all	1.49	0.0842993	2.2371
ZEB1_all	1.46	0.0874879	2.36297
wgEncodeUwDnaseHAEpiC	1.44	0.089686	1.29634
wgEncodeUwDnaseWI38TamoxifenTamoxifen	1.43	0.0908075	1.36585
SIX5_all	1.41	0.0930964	2.87007
JUN_all	1.41	0.0930964	1.09737
wgEncodeUwDnaseHAh	1.37	0.0978648	1.32188
wgEncodeBroadHistoneHepg2H4k20me1StdAln	1.37	0.0978648	0.945385
wgEncodeUWDukeDnaseNHEK	1.36	0.099098	1.14617
wgEncodeUWDukeDnaseK562	1.36	0.099098	1.23217
wgEncodeUwDnaseHCFaa	1.36	0.099098	1.38815
wgEncodeBroadHistoneK562H3k4me3StdAln	1.36	0.099098	0.888842
wgEncodeUwDnaseHMVECdAd	1.35	0.100348	1.36251
wgEncodeUwDnaseHRCEpiC	1.33	0.102901	1.354
wgEncodeOpenChromFaireHelas3Pk	1.33	0.102901	1.45264
TFAP2C_all	1.33	0.102901	1.64925
wgEncodeUwDnaseHVMF	1.32	0.104204	1.30327
wgEncodeUwDnaseHCM	1.32	0.104204	1.33696
wgEncodeBroadHistoneNhdfadH3k4me2StdAln	1.32	0.104204	0.705038
wgEncodeBroadHistoneNhekH4k20me1StdAln	1.31	0.105524	1.09265
wgEncodeUWDukeDnaseHUVEC	1.28	0.109599	1.17066
wgEncodeOpenChromFaireGm12891Pk	1.27	0.110995	1.04866
wgEncodeBroadHistoneHepg2H3k36me3StdAln	1.26	0.112411	0.686488
BATF_all	1.26	0.112411	2.30111
wgEncodeDukeDnaseHuh7.5	1.25	0.113846	1.24848
wgEncodeBroadHistoneHelas3H3k27acStdAln	1.25	0.113846	0.685377
wgEncodeUwDnaseH7hESC	1.22	0.118276	1.11164
wgEncodeBroadHistoneHsmmH2azStdAln	1.22	0.118276	0.806442
wgEncodeBroadHistoneHepg2H3k27acStdAln	1.2	0.121335	0.777449
wgEncodeUwDnaseMonocytesCD14RO01746	1.19	0.122898	1.25622
wgEncodeBroadHistoneOsteoblH2azStdAln	1.19	0.122898	0.712381
wgEncodeBroadHistoneH1hescH3k4me1StdAln	1.18	0.124482	0.766264
MYBL2_all	1.18	0.124482	1.50462
MXI1_all	1.18	0.124482	1.39553
wgEncodeOpenChromFaireHtr8Pk	1.17	0.12609	1.16837
BDP1_all	1.17	0.12609	2.63991
wgEncodeUwDnaseHMVECdNeo	1.14	0.131052	1.25291
wgEncodeBroadHistoneHsmmH3k4me3StdAln	1.1	0.138011	0.815156
wgEncodeUWDukeDnaseA549	1.09	0.139814	1.32824
Th1_H3K27ac_active_enhancers	1.09	0.139814	0.655948
PBX3_all	1.09	0.139814	2.63713
POLR3G_all	1.08	0.141645	2.54119
T-bet_Th1_10-7-peaks	1.07	0.143502	1.51068
wgEncodeUwDnaseJurkat	1.05	0.147299	1.16906
wgEncodeUwDnaseHMVECdLyNeo	1.05	0.147299	1.20075
wgEncodeBroadHistoneHmecH3k27acStdAln	1.05	0.147299	0.721362
NFYA_all	1.04	0.14924	1.82545
PHF8_all	1.03	0.15121	1.6107
wgEncodeUwDnaseBE2C	1.02	0.15321	1.23566
EGR1_all	1.02	0.15321	1.5349
wgEncodeBroadHistoneH1hescH4k20me1StdAln	1.01	0.155239	0.976011
FOXP2_all	1.01	0.155239	1.93784
CCNT2_all	1	0.157299	1.68586
wgEncodeUWDukeDnaseGM12878	0.99	0.15939	1.19077
wgEncodeBroadHistoneNhaH3k27me3StdAln	0.99	0.15939	0.691592
wgEncodeBroadHistoneNhaH3k4me1StdAln	0.98	0.161513	0.5774
IKZF1_all	0.97	0.163669	2.14651
wgEncodeOpenChromFaireUrotsaUt189Pk	0.96	0.165857	1.28554
wgEncodeUwDnaseHPAEC	0.94	0.170334	1.27522
wgEncodeOpenChromFaireNhekPk	0.93	0.172625	1.23209
wgEncodeDukeDnaseProgFib	0.92	0.174951	1.13882
wgEncodeUwDnaseNT2D1	0.91	0.177313	1.07592
wgEncodeBroadHistoneNhekH3k4me1StdAln	0.91	0.177313	0.530614
GATA3_Th1	0.9	0.179712	1.69742
wgEncodeDukeDnasepHTE	0.89	0.182149	1.08007
wgEncodeBroadHistoneHsmmH3k79me2StdAln	0.89	0.182149	0.582221
TCF7L2_all	0.89	0.182149	1.07206
SP4_all	0.89	0.182149	1.86678
CHD2_all	0.89	0.182149	1.25651
GATA2_all	0.88	0.184625	1.01708
wgEncodeOpenChromFaireHelas3Ifng4hPk	0.87	0.187139	0.768539
FOSL1_all	0.87	0.187139	2.39448
wgEncodeDukeDnaseRWPE1	0.85	0.192288	1.10404
wgEncodeBroadHistoneHsmmtH3k9acStdAln	0.84	0.194924	0.639666
wgEncodeBroadHistoneHsmmH3k27acStdAln	0.84	0.194924	0.669327
wgEncodeUwDnaseCaco2	0.82	0.200325	1.01969
STAT5A_all	0.81	0.203092	1.41376
wgEncodeBroadHistoneHepg2H3k27me3StdAln	0.8	0.205903	0.486919
JUND_all	0.8	0.205903	0.976719
wgEncodeOpenChromFaireGlioblaPk	0.79	0.208761	1.18807
wgEncodeDukeDnasePanIsletD	0.79	0.208761	1.07135
NFYB_all	0.78	0.211665	1.68948
wgEncodeUwDnaseHCF	0.77	0.214618	1.21099
E2F4_all	0.76	0.217619	1.49583
wgEncodeUwDnaseAG04449	0.75	0.220671	1.10765
wgEncodeDukeDnaseiPS	0.73	0.22693	0.916215
wgEncodeBroadHistoneK562H4k20me1StdAln	0.72	0.230139	0.650733
Th2_H3K27ac_active_enhancers	0.72	0.230139	0.570836
FOSL2_all	0.72	0.230139	1.44153
wgEncodeUwDnaseHCT116	0.71	0.233403	1.4259
wgEncodeDukeDnaseUrothelia	0.71	0.233403	1.17767
TAF1_all	0.71	0.233403	1.08759
RAD21_all	0.7	0.236724	1.01711
wgEncodeBroadHistoneNhlfH3k4me1StdAln	0.69	0.240101	0.559181
wgEncodeUwDnaseNHDFAd	0.67	0.247034	0.997222
wgEncodeDukeDnaseGM12892	0.67	0.247034	1.01845
wgEncodeDukeDnaseGM12891	0.67	0.247034
KAP1_all	0.66	0.250592	1.05832
CBX3_all	0.66	0.250592	1.24539
wgEncodeOpenChromFaireHepg2Pk	0.65	0.254213	1.03242
wgEncodeDukeDnaseHepatocytes	0.64	0.257899
wgEncodeOpenChromFairePanisletsPk	0.62	0.265471
wgEncodeDukeDnaseMyometr	0.62	0.265471	1.07462
MAFK_all	0.62	0.265471
ATF3_all	0.59	0.277356	1.50452
wgEncodeUwDnaseWI38	0.57	0.285652	1.08581
GTF3C2_all	0.56	0.289918	1.74614
wgEncodeDukeDnaseMedullo	0.55	0.294266
TCF3_all	0.55	0.294266	1.99066
PML_all	0.55	0.294266
MAZ_all	0.55	0.294266	0.957263
Birzele_merged_ChIP_Hs_Treg_FOXP3	0.53	0.303215	2.09345
wgEncodeBroadHistoneOsteoblH3k4me1StdAln	0.52	0.307821	0.394252
UBTF_all	0.52	0.307821	1.20328
FOXA1_all	0.52	0.307821	0.946173
GATA1_all	0.5	0.317311
ZNF263_all	0.48	0.327187	0.887371
TEAD4_all	0.48	0.327187	0.910595
NFKB_binding_regions	0.48	0.327187
wgEncodeBroadHistoneK562H3k27me3StdAln	0.47	0.332278
wgEncodeBroadHistoneHuvecH3k4me3StdAln	0.47	0.332278	0.577681
FOXA2_all	0.47	0.332278
wgEncodeDukeDnaseLNCaPAndrogen	0.46	0.337475	0.880407
SMC3_all	0.46	0.337475	1.03626
wgEncodeUwDnaseBJ	0.45	0.342782	0.881386
wgEncodeOpenChromFaireAstrocyPk	0.44	0.348202	1.05825
wgEncodeDukeDnaseIshikawaTamoxifen	0.44	0.348202
wgEncodeBroadHistoneHsmmH3k27me3StdAln	0.44	0.348202	0.573612
TAF7_all	0.44	0.348202	1.13199
wgEncodeDukeDnaseHeLaS3IFNa4h	0.43	0.353739	0.967663
wgEncodeBroadHistoneHuvecH3k27me3StdAln	0.43	0.353739	0.364933
wgEncodeUwDnaseRPTEC	0.42	0.359397	0.978956
wgEncodeDukeDnasePanIslets	0.42	0.359397
REST_all	0.42	0.359397
NR2C2_all	0.42	0.359397	2.55293
RPC155_all	0.41	0.36518	1.50297
IRF1_all	0.41	0.36518	1.05448
EP300_all	0.41	0.36518	0.645092
CEBPB_all	0.41	0.36518	0.835101
wgEncodeUwDnaseNHDFneo	0.4	0.371093	0.815373
wgEncodeDukeDnaseIshikawaEstradiol	0.4	0.371093	0.984827
ATF1_all	0.4	0.371093	2.00784
wgEncodeDukeDnaseMCF7Hypoxia	0.39	0.377141	0.911225
MTA3_all	0.39	0.377141	1.329
wgEncodeUwDnaseGM12864	0.38	0.383329	1.01419
wgEncodeBroadHistoneNhlfH3k9acStdAln	0.37	0.389661	0.647181
wgEncodeBroadHistoneNhaH3k4me3StdAln	0.37	0.389661	0.547519
wgEncodeUwDnasePANC1	0.36	0.396144	0.93226
wgEncodeBroadHistoneHsmmtH4k20me1StdAln	0.36	0.396144	0.479126
EBF1_all	0.35	0.402784	1.24315
wgEncodeOpenChromFaireK562NabutPk	0.34	0.409587	0.873211
wgEncodeDukeDnaseHTR8svn	0.34	0.409587	0.943048
NR2F2_all	0.33	0.41656	0.939271
ESRRA_all	0.33	0.41656	3.02554
E2F6_all	0.33	0.41656
wgEncodeDukeDnaseGM19240	0.32	0.423711
HDAC2_all	0.32	0.423711
CTCF_all	0.32	0.423711
TFAP2A_all	0.31	0.431047
BCL11A_all	0.31	0.431047	1.63482
ZBTB7A_all	0.29	0.446312	1.32237
NR3C1_all	0.29	0.446312
Hawkins_TableS2a_Th1_enhancers	0.29	0.446312
wgEncodeDukeDnaseUrotheliaUT189	0.28	0.45426	0.733923
MAFF_all	0.28	0.45426	0.852284
wgEncodeOpenChromFaireMedulloPk	0.27	0.462433	0.680959
SP1_all	0.27	0.462433
wgEncodeDukeDnaseMelano	0.26	0.470842	0.681076
wgEncodeDukeDnaseFibrobl	0.26	0.470842	0.48406
wgEncodeBroadHistoneHelas3H4k20me1StdAln	0.25	0.4795	0.636283
TRIM28_all	0.25	0.4795	1.13048
wgEncodeOpenChromFaireHelas3Ifna4hPk	0.24	0.488422	0.492633
wgEncodeBroadHistoneNhdfadH3k27me3StdAln	0.24	0.488422	0.309799
SAP30_all	0.24	0.488422
wgEncodeBroadHistoneOsteoblH3k9me3StdAln	0.23	0.497624	0.936245
wgEncodeBroadHistoneHuvecH3k9acStdAln	0.23	0.497624	0.431756
wgEncodeUwDnaseHRGEC	0.22	0.507122
GABPA_all	0.22	0.507122
BACH1_all	0.22	0.507122
SMARCB1_all	0.21	0.516937
ZNF217_all	0.2	0.527089
wgEncodeDukeDnaseGliobla	0.2	0.527089
PAX5_all	0.19	0.537603
KDM5B_all	0.19	0.537603
TAL1_all	0.18	0.548506
wgEncodeOpenChromFaireH1hescPk	0.16	0.571608
HNF4G_all	0.16	0.571608
CEBPD_all	0.16	0.571608
GATA3_Th2	0.16	0.571608
wgEncodeBroadHistoneHuvecH4k20me1StdAln	0.15	0.583882
USF2_all	0.15	0.583882
wgEncodeOpenChromFaireUrotsaPk	0.14	0.596701
CTCFL_all	0.13	0.61012
wgEncodeUWDukeDnaseMCF7	0.12	0.624206
wgEncodeUWDukeDnaseHeLaS3	0.12	0.624206
wgEncodeBroadHistoneHelas3H3k27me3StdAln	0.12	0.624206
SUZ12_all	0.12	0.624206
CTBP2_all	0.12	0.624206
SMARCA4_all	0.11	0.63904
MBD4_all	0.11	0.63904
wgEncodeBroadHistoneHsmmH3k9me3StdAln	0.1	0.654721
CREB1_all	0.1	0.654721
ZNF274_all	0.09	0.671373
wgEncodeUWDukeDnaseHepG2	0.09	0.671373
wgEncodeDukeDnaseCLL	0.09	0.671373
wgEncodeDukeDnase8988T	0.09	0.671373
wgEncodeBroadHistoneNhekH3k27me3StdAln	0.09	0.671373
wgEncodeBroadHistoneHmecH4k20me1StdAln	0.09	0.671373
HNF4A_all	0.09	0.671373
ZKSCAN1_all	0.08	0.689157
wgEncodeBroadHistoneK562H3k9me3StdAln	0.08	0.689157
wgEncodeBroadHistoneGm12878H4k20me1StdAln	0.08	0.689157
SETDB1_all	0.08	0.689157
SREBP1_all	0.07	0.708281
wgEncodeUwDnaseGM12865	0.06	0.729034
POU5F1_all	0.06	0.729034
GTF2B_all	0.06	0.729034
wgEncodeBroadHistoneNhlfH3k27me3StdAln	0.05	0.75183
SMARCC2_all	0.05	0.75183
PRDM1_all	0.05	0.75183
PPARGC1A_all	0.05	0.75183
MEF2C_all	0.05	0.75183
IRF4_all	0.05	0.75183
HDAC1_all	0.05	0.75183
ESR1_all	0.05	0.75183
wgEncodeOpenChromFaireK562OhureaPk	0.04	0.777297
wgEncodeDukeDnaseGM19238	0.04	0.777297
STAT2_all	0.04	0.777297
NANOG_all	0.04	0.777297
wgEncodeDukeDnaseT47D	0.03	0.806496
wgEncodeDukeDnaseChorion	0.03	0.806496
SIRT6_all	0.03	0.806496
RBBP5_all	0.03	0.806496
NRF1_all	0.03	0.806496
KDM5A_all	0.03	0.806496
ELK4_all	0.03	0.806496
HDAC6_all	0.02	0.841481
BRF2_all	0.02	0.841481
ZZZ3_all	0.01	0.887537
wgEncodeUwDnaseCD20	0.01	0.887537
wgEncodeDukeDnaseHSMMemb	0.01	0.887537
wgEncodeDukeDnaseGM18507	0.01	0.887537
RDBP_all	0.01	0.887537
JUNB_all	0.01	0.887537
GRp20_all	0.01	0.887537
FAM48A_all	0.01	0.887537
BCL3_all	0.01	0.887537
wgEncodeUwDnaseHMVECdLyAd	0	1
wgEncodeUwDnaseHAsp	0	1
wgEncodeOpenChromFaireNhbePk	0	1
wgEncodeDukeDnaseOsteobl	0	1
wgEncodeBroadHistoneNhlfH4k20me1StdAln	0	1
wgEncodeBroadHistoneHsmmH4k20me1StdAln	0	1
wgEncodeBroadHistoneHmecH3k27me3StdAln	0	1
wgEncodeBroadHistoneGm12878H3k9me3StdAln	0	1
USF1_all	0	1
THAP1_all	0	1
SRF_all	0	1
SMARCC1_all	0	1
NFATC1_all	0	1
MEF2A_all	0	1
HMGN3_all	0	1
HDAC8_all	0	1
EZH2_all	0	1
CHD1_all	0	1
BHLHE40_all	0	1

## Sheet: Coronary
Dataset	llike.ratio	p value	Odds Ratio
wgEncodeBroadHistoneNhlfH3k36me3StdAln	5.2042	0.00125443	2.83513
wgEncodeDukeDnaseOsteobl	4.1548	0.00394361	3.09177
wgEncodeBroadHistoneH1hescH3k36me3StdAln	4.0022	0.00466638	2.82245
wgEncodeBroadHistoneOsteoblH3k36me3StdAln	3.9526	0.00492929	2.32401
wgEncodeBroadHistoneGm12878H3k27me3StdAln	3.649	0.00690314	3.14323
wgEncodeBroadHistoneNhekH3k36me3StdAln	3.2793	0.0104378	2.31337
wgEncodeOpenChromFaireHepg2Pk	3.1015	0.0127534	3.56991
wgEncodeUWDukeDnaseHUVEC	3.0691	0.0132292	3.03091
GATA3_all	3.0547	0.0134465	3.44491
wgEncodeBroadHistoneHsmmH3k36me3StdAln	2.9625	0.0149275	2.00633
FOXA1_all	2.8245	0.0174653	3.35255
TCF7L2_all	2.7108	0.0198891	3.18131
wgEncodeBroadHistoneHelas3H3k4me3StdAln	2.6828	0.0205377	2.62123
wgEncodeBroadHistoneHsmmtH3k27acStdAln	2.6306	0.021806	2.09743
wgEncodeBroadHistoneHsmmtH3k36me3StdAln	2.5954	0.0227068	1.97041
wgEncodeUwDnaseHVMF	2.5327	0.0244081	3.52472
wgEncodeBroadHistoneHelas3H3k36me3StdAln	2.4196	0.0278198	2.0624
wgEncodeBroadHistoneHelas3H3k27me3StdAln	2.4007	0.0284366	1.81863
wgEncodeDukeDnaseHuh7.5	2.2212	0.0350569	3.68442
wgEncodeBroadHistoneK562H3k36me3StdAln	2.1695	0.0372488	2.0668
wgEncodeUwDnaseHAEpiC	1.9904	0.0460217	3.25144
wgEncodeBroadHistoneOsteoblH2azStdAln	1.9794	0.0466269	2.23778
wgEncodeBroadHistoneHepg2H3k9acStdAln	1.8146	0.0567741	2.58536
wgEncodeDukeDnaseHepatocytes	1.7844	0.0588748	3.39686
wgEncodeBroadHistoneHmecH3k27acStdAln	1.7722	0.0597468	2.16551
ZNF217_all	1.7245	0.0632901	4.54264
wgEncodeBroadHistoneHelas3H3k4me2StdAln	1.6728	0.0673849	1.86238
wgEncodeBroadHistoneHepg2H3k36me3StdAln	1.6475	0.0694911	1.88798
wgEncodeBroadHistoneHelas3H3k27acStdAln	1.6244	0.0714758	1.84903
wgEncodeDukeDnaseMCF7Hypoxia	1.5977	0.0738457	3.37219
wgEncodeUWDukeDnaseLNCaP	1.5906	0.07449	2.41162
wgEncodeBroadHistoneHsmmH3k4me1StdAln	1.5381	0.0794459	1.97927
wgEncodeUWDukeDnaseMCF7	1.4888	0.0844244	3.31211
RPC155_all	1.4804	0.0853057	5.79778
HNF4G_all	1.4192	0.0920358	4.19425
wgEncodeBroadHistoneHmecH3k4me2StdAln	1.412	0.0928647	1.97222
Th2_H3K27ac_active_enhancers	1.3718	0.0976446	1.65259
wgEncodeBroadHistoneNhekH3k27acStdAln	1.2848	0.108935	1.85261
wgEncodeBroadHistoneHsmmtH3k4me1StdAln	1.2799	0.109612	1.67327
wgEncodeOpenChromFaireHelas3Ifng4hPk	1.279	0.109737	2.44027
wgEncodeBroadHistoneK562H3k9acStdAln	1.2668	0.111446	2.01152
wgEncodeBroadHistoneHsmmtH3k9acStdAln	1.2624	0.112069	1.91429
wgEncodeBroadHistoneHsmmtH2azStdAln	1.223	0.117825	1.83391
wgEncodeOpenChromFaireK562Pk	1.2047	0.120609	2.83926
wgEncodeDukeDnaseFibrobl	1.1982	0.121615	2.47076
wgEncodeBroadHistoneNhlfH3k4me1StdAln	1.1958	0.121989	1.76488
EZH2_all	1.1922	0.122552	3.25483
STAT2_all	1.1831	0.123989	4.5278
wgEncodeBroadHistoneHepg2H3k27acStdAln	1.1724	0.125702	2.18017
wgEncodeBroadHistoneK562H3k4me1StdAln	1.1057	0.136994	1.54192
wgEncodeDukeDnaseiPS	1.0794	0.141755	2.31783
wgEncodeBroadHistoneGm12878H3k36me3StdAln	1.0708	0.143352	1.36009
wgEncodeBroadHistoneK562H3k4me3StdAln	1.045	0.148266	1.93295
wgEncodeBroadHistoneNhekH3k4me2StdAln	1.0196	0.15329	1.6697
wgEncodeDukeDnaseGM12892	1.0157	0.154079	2.22894
BCL3_all	1.0135	0.154525	3.48986
ESRRA_all	0.9555	0.166852	6.14714
wgEncodeBroadHistoneK562H3k27acStdAln	0.8985	0.180076	1.78531
wgEncodeUwDnaseHMVECdNeo	0.8633	0.188846	2.65328
STAT5A_all	0.8536	0.191349	3.59699
wgEncodeBroadHistoneK562H3k4me2StdAln	0.836	0.195991	1.78411
wgEncodeUwDnaseHMVECdBlNeo	0.8329	0.196822	2.56771
CEBPD_all	0.8223	0.199695	3.99488
wgEncodeUwDnaseHPAF	0.8062	0.204155	3.12125
ELF1_all	0.7989	0.206215	2.92862
wgEncodeBroadHistoneOsteoblH3k4me1StdAln	0.795	0.207326	1.26049
wgEncodeBroadHistoneHuvecH3k27me3StdAln	0.763	0.216714	1.32578
FOS_all	0.7624	0.216895	2.30781
wgEncodeUwDnaseCaco2	0.7411	0.223431	2.91502
wgEncodeDukeDnaseHuh7	0.7238	0.228913	3.1645
wgEncodeDukeDnaseMelano	0.7126	0.232549	2.58636
TBL1XR1_all	0.7012	0.236322	3.12229
wgEncodeUwDnaseHMVECdBlAd	0.6886	0.240579	2.45104
wgEncodeBroadHistoneH1hescH3k27me3StdAln	0.6878	0.240852	1.91812
TCF12_all	0.6463	0.255569	3.28525
wgEncodeBroadHistoneHmecH3k9acStdAln	0.5708	0.285314	2.03273
wgEncodeBroadHistoneHuvecH3k4me1StdAln	0.5601	0.289875	1.17383
wgEncodeOpenChromFaireHuvecPk	0.5561	0.291604	2.09643
HDAC1_all	0.5548	0.292169	2.86179
RXRA_all	0.5498	0.294354	3.55836
wgEncodeBroadHistoneHmecH3k27me3StdAln	0.535	0.300945	2.60583
wgEncodeBroadHistoneHmecH3k4me3StdAln	0.5279	0.304175	1.93185
wgEncodeBroadHistoneGm12878H3k79me2StdAln	0.5237	0.306107
wgEncodeUWDukeDnaseTh1	0.517	0.309221	1.53644
Th1.Dnase.UW	0.517	0.309221	1.53644
SUZ12_all	0.5078	0.313565	3.74886
wgEncodeBroadHistoneNhaH3k36me3StdAln	0.4986	0.317989	1.21888
wgEncodeUwDnaseHPF	0.4913	0.321558	2.92949
wgEncodeBroadHistoneGm12878H3k4me2StdAln	0.4808	0.326784
wgEncodeBroadHistoneHepg2H3k4me2StdAln	0.4674	0.333619	1.5901
FOXA2_all	0.4611	0.336898	3.31089
wgEncodeOpenChromFaireHelas3Pk	0.4509	0.3423	2.8185
wgEncodeBroadHistoneNhaH3k4me1StdAln	0.4413	0.347491	1.07404
SREBP1_all	0.4318	0.352733	5.19585
wgEncodeBroadHistoneGm12878H3k9me3StdAln	0.4271	0.355367
USF2_all	0.4197	0.359568	3.28668
POLR2A_all	0.4137	0.363025	1.78596
JUNB_all	0.4059	0.367589	3.24828
NFIC_all	0.4053	0.367943	2.66596
KDM5B_all	0.3965	0.373195	2.78748
wgEncodeBroadHistoneHuvecH3k27acStdAln	0.3945	0.374403
wgEncodeBroadHistoneHmecH3k4me1StdAln	0.3905	0.376835	0.997069
wgEncodeBroadHistoneNhdfadH3k4me2StdAln	0.3794	0.383704
FOXP2_all	0.3753	0.386286	3.10483
STAT1_all	0.3751	0.386413	3.11239
USF1_all	0.3562	0.398648	2.86013
wgEncodeBroadHistoneK562H4k20me1StdAln	0.3534	0.400508
wgEncodeDukeDnaseT47D	0.3414	0.408624	2.61975
wgEncodeDukeDnaseGM19239	0.3359	0.412425	2.29372
wgEncodeDukeDnasepHTE	0.3319	0.415222	2.06908
wgEncodeBroadHistoneHelas3H3k9acStdAln	0.3316	0.415432	1.12028
wgEncodeBroadHistoneK562H3k27me3StdAln	0.3309	0.415925
wgEncodeBroadHistoneK562H2azStdAln	0.3282	0.417834	1.1429
wgEncodeBroadHistoneHsmmH3k27acStdAln	0.3198	0.423856
wgEncodeDukeDnaseFibroP	0.3177	0.425381	2.45399
wgEncodeBroadHistoneNhekH3k4me1StdAln	0.316	0.426623	0.896724
wgEncodeUwDnaseBJ	0.3114	0.430009	2.60232
wgEncodeUwDnaseHPdLF	0.3109	0.430379	2.62068
wgEncodeBroadHistoneNhekH3k4me3StdAln	0.3045	0.435165	1.57311
wgEncodeBroadHistoneHsmmH3k27me3StdAln	0.2942	0.443038	1.66134
wgEncodeBroadHistoneHepg2H3k27me3StdAln	0.292	0.444749	0.941406
Th1_H3K27ac_active_enhancers	0.2918	0.444905	0.937855
wgEncodeBroadHistoneGm12878H3k27acStdAln	0.2846	0.450577	0.995237
ARID3A_all	0.2815	0.453054	2.7573
wgEncodeBroadHistoneGm12878H3k4me3StdAln	0.277	0.456688
wgEncodeBroadHistoneNhdfadH3k27acStdAln	0.2747	0.458563
wgEncodeUwDnaseNHDFneo	0.2717	0.461027	2.51333
wgEncodeUWDukeDnaseHepG2	0.2691	0.46318	2.24795
SP1_all	0.2644	0.467112	2.63133
wgEncodeDukeDnaseHPDE6E6E7	0.2632	0.468124	2.42251
wgEncodeBroadHistoneHsmmH3k4me2StdAln	0.2532	0.476701
wgEncodeBroadHistoneHepg2H2azStdAln	0.252	0.477748	1.48097
CEBPB_all	0.2479	0.481351	2.17553
wgEncodeDukeDnaseGM12891	0.2466	0.482503	2.34252
wgEncodeBroadHistoneGm12878H2azStdAln	0.2459	0.483125
wgEncodeBroadHistoneHuvecH3k36me3StdAln	0.2439	0.48491	0.852095
wgEncodeUwDnaseSKNSHRA	0.2402	0.488241	2.69867
wgEncodeUwDnaseAG10803	0.2395	0.488876	2.42762
wgEncodeBroadHistoneGm12878H3k9acStdAln	0.2338	0.494093
GATA3_Th1	0.2337	0.494186	3.3604
E2F6_all	0.224	0.503286
wgEncodeBroadHistoneNhaH3k4me3StdAln	0.2216	0.505582
wgEncodeBroadHistoneNhekH3k9acStdAln	0.2168	0.510228
wgEncodeBroadHistoneHelas3H4k20me1StdAln	0.2158	0.511205
wgEncodeBroadHistoneHuvecH3k9acStdAln	0.2136	0.513366
E2F4_all	0.2095	0.517436
wgEncodeBroadHistoneNhlfH3k27acStdAln	0.2074	0.519543
Birzele_merged_ChIP_Hs_Treg_FOXP3	0.2	0.527089
TFAP2A_all	0.1977	0.529475
ATF3_all	0.1959	0.531355
MAZ_all	0.1958	0.53146
wgEncodeBroadHistoneHsmmtH3k79me2StdAln	0.1837	0.544425
wgEncodeBroadHistoneHsmmH4k20me1StdAln	0.1829	0.545303
wgEncodeUwDnaseHAh	0.1714	0.558217
STAT3_all	0.1673	0.562963
wgEncodeBroadHistoneNhekH4k20me1StdAln	0.1658	0.564718
RFX5_all	0.1638	0.567076
HMGN3_all	0.1574	0.57475
wgEncodeUWDukeDnaseGM12878	0.1569	0.575358
wgEncodeBroadHistoneHepg2H4k20me1StdAln	0.1568	0.575479
ZBTB7A_all	0.1534	0.579651
CTCF_all	0.1531	0.580021
wgEncodeBroadHistoneHsmmH3k9acStdAln	0.1501	0.583757
wgEncodeBroadHistoneHuvecH3k4me3StdAln	0.1497	0.584259
wgEncodeDukeDnaseGM19240	0.145	0.590221
GATA2_all	0.1397	0.597095
wgEncodeUWDukeDnaseK562	0.1385	0.598674
wgEncodeBroadHistoneH1hescH4k20me1StdAln	0.1382	0.599071
wgEncodeBroadHistoneHsmmH3k9me3StdAln	0.1367	0.60106
wgEncodeBroadHistoneNhdfadH3k9acStdAln	0.1349	0.603466
wgEncodeOpenChromFaireGm12892Pk	0.1321	0.607249
wgEncodeUwDnaseCD34Mobilized	0.1291	0.611359
wgEncodeBroadHistoneNhdfadH3k4me3StdAln	0.1251	0.616934
wgEncodeBroadHistoneNhlfH4k20me1StdAln	0.1245	0.61778
wgEncodeBroadHistoneHsmmtH3k4me3StdAln	0.1201	0.624062
wgEncodeUwDnaseSKMC	0.1188	0.625945
wgEncodeBroadHistoneNhaH3k27me3StdAln	0.1182	0.626818
EP300_all	0.118	0.62711
wgEncodeBroadHistoneK562H3k9me3StdAln	0.1167	0.629014
wgEncodeBroadHistoneHepg2H3k4me3StdAln	0.115	0.631524
wgEncodeUwDnaseGM12865	0.1126	0.635106
SIN3A_all	0.1106	0.638127
wgEncodeDukeDnaseProgFib	0.1089	0.640721
wgEncodeDukeDnaseIshikawaTamoxifen	0.107	0.64365
IKZF1_all	0.107	0.64365
wgEncodeBroadHistoneHuvecH4k20me1StdAln	0.106	0.645204
wgEncodeDukeDnaseTh0	0.1059	0.64536
wgEncodeDukeDnaseLNCaPAndrogen	0.105	0.646767
KAP1_all	0.1043	0.647867
wgEncodeUWDukeDnaseH1hESC	0.1042	0.648024
BCL11A_all	0.1034	0.649287
wgEncodeUwDnaseCMK	0.1015	0.65231
wgEncodeBroadHistoneH1hescH3k9acStdAln	0.0985	0.657153
wgEncodeBroadHistoneH1hescH3k27acStdAln	0.0981	0.657806
MXI1_all	0.096	0.661257
wgEncodeBroadHistoneOsteoblH3k9me3StdAln	0.0952	0.662584
wgEncodeUWDukeDnaseNHEK	0.0928	0.666604
wgEncodeBroadHistoneNhdfadH3k27me3StdAln	0.0915	0.668808
MAFK_all	0.0909	0.669831
wgEncodeUwDnaseHRCEpiC	0.0908	0.670002
ZNF263_all	0.0882	0.674485
SETDB1_all	0.0874	0.675881
wgEncodeBroadHistoneH1hescH3k4me1StdAln	0.0869	0.676756
wgEncodeOpenChromFaireGm12891Pk	0.0868	0.676932
wgEncodeUwDnaseWI38TamoxifenTamoxifen	0.0864	0.677635
wgEncodeUwDnaseHNPCEpiC	0.084	0.681895
wgEncodeDukeDnaseGM19238	0.0837	0.682433
wgEncodeUwDnaseAG09309	0.0829	0.683872
wgEncodeUwDnaseCD20	0.0821	0.685319
wgEncodeDukeDnaseH9ES	0.0794	0.690264
wgEncodeBroadHistoneNhlfH3k4me2StdAln	0.0783	0.692306
wgEncodeDukeDnasePanIsletD	0.0776	0.693615
wgEncodeUwDnaseNHLF	0.0766	0.695496
SIN3AK20_all	0.0766	0.695496
wgEncodeUwDnaseTh2	0.0754	0.697772
wgEncodeBroadHistoneHmecH3k36me3StdAln	0.075	0.698535
wgEncodeUwDnaseHMVECdLyAd	0.0747	0.699109
wgEncodeOpenChromFaireK562OhureaPk	0.072	0.704336
wgEncodeBroadHistoneHsmmH3k4me3StdAln	0.0719	0.704532
wgEncodeOpenChromFaireHtr8Pk	0.0712	0.705907
TAF1_all	0.0712	0.705907
wgEncodeUwDnaseHBMEC	0.0706	0.707091
TFAP2C_all	0.0705	0.707289
wgEncodeUwDnaseGM12864	0.0691	0.710077
MAX_all	0.0653	0.717811
wgEncodeDukeDnaseStellate	0.0646	0.719263
NFKB_binding_regions	0.0643	0.719888
wgEncodeUwDnaseMonocytesCD14RO01746	0.0642	0.720097
wgEncodeUwDnaseJurkat	0.0641	0.720306
wgEncodeDukeDnaseMedullo	0.0634	0.721773
wgEncodeDukeDnase8988T	0.0628	0.723038
HDAC2_all	0.062	0.724736
wgEncodeUWDukeDnaseHSMM	0.0618	0.725162
wgEncodeUwDnaseNT2D1	0.0617	0.725376
GABPA_all	0.0614	0.726017
REST_all	0.0611	0.726661
SMC3_all	0.061	0.726875
PHF8_all	0.0609	0.72709
wgEncodeOpenChromFaireAstrocyPk	0.0607	0.727521
RBBP5_all	0.0602	0.728601
wgEncodeUwDnaseHMVECLBl	0.0588	0.731652
wgEncodeOpenChromFaireGm19239Pk	0.058	0.733414
wgEncodeUwDnaseHMVECdLyNeo	0.0576	0.7343
wgEncodeUwDnaseHFFMyc	0.0558	0.73833
ATF2_all	0.0556	0.738782
GATA1_all	0.0551	0.739917
wgEncodeBroadHistoneHuvecH3k4me2StdAln	0.0547	0.740828
wgEncodeBroadHistoneNhdfadH3k36me3StdAln	0.0542	0.741973
CHD1_all	0.0531	0.744513
FOXM1_all	0.0521	0.746847
wgEncodeDukeDnaseIshikawaEstradiol	0.0516	0.748023
wgEncodeUwDnaseHIPEpiC	0.0513	0.748732
wgEncodeDukeDnaseHSMMemb	0.051	0.749443
POU2F2_all	0.051	0.749443
BATF_all	0.0508	0.749918
TEAD4_all	0.0507	0.750156
wgEncodeOpenChromFaireGlioblaPk	0.0506	0.750394
wgEncodeOpenChromFairePanisletsPk	0.0505	0.750633
CBX3_all	0.0504	0.750872
Hawkins_TableS2a_Th1_enhancers	0.0502	0.75135
wgEncodeUwDnaseHRPEpiC	0.0493	0.753516
CCNT2_all	0.0485	0.75546
wgEncodeUwDnaseHAsp	0.0483	0.755949
wgEncodeBroadHistoneOsteoblH3k27acStdAln	0.0481	0.756438
IRF4_all	0.0473	0.758409
MAFF_all	0.0472	0.758656
wgEncodeUwDnaseHRGEC	0.047	0.759152
wgEncodeOpenChromFaireGm18507Pk	0.0467	0.759898
wgEncodeDukeDnaseCLL	0.0461	0.761399
wgEncodeUwDnaseSKNMC	0.0432	0.768805
wgEncodeUwDnaseHCFaa	0.0431	0.769065
wgEncodeOpenChromFaireNhbePk	0.0429	0.769586
SMARCB1_all	0.0416	0.773007
wgEncodeOpenChromFaireK562NabutPk	0.0413	0.773804
UBTF_all	0.0411	0.774338
wgEncodeBroadHistoneHmecH4k20me1StdAln	0.041	0.774605
wgEncodeDukeDnaseRWPE1	0.0408	0.775141
wgEncodeUwDnaseHGF	0.0402	0.776756
wgEncodeUwDnaseBE2C	0.0401	0.777027
TAL1_all	0.0393	0.779204
IRF1_all	0.0373	0.784753
EBF1_all	0.0367	0.786449
ESR1_all	0.0366	0.786733
TBP_all	0.0364	0.787303
GTF2F1_all	0.036	0.788447
RUNX3_all	0.0358	0.789021
wgEncodeDukeDnaseMyometr	0.0354	0.790176
ETS1_all	0.0347	0.792212
wgEncodeUwDnaseHEEpiC	0.0342	0.793681
PML_all	0.0341	0.793976
wgEncodeOpenChromFaireNhekPk	0.0334	0.796054
wgEncodeUWDukeDnaseA549	0.0332	0.796652
wgEncodeDukeDnaseAoSMC	0.033	0.797252
wgEncodeBroadHistoneNhekH3k9me1StdAln	0.0328	0.797854
MTA3_all	0.0324	0.799064
WRNIP1_all	0.0323	0.799368
wgEncodeUwDnaseHFF	0.032	0.800282
SAP30_all	0.0313	0.802433
wgEncodeUwDnaseHMF	0.0306	0.804609
MEF2A_all	0.0302	0.805865
TRIM28_all	0.0299	0.806812
wgEncodeBroadHistoneH1hescH3k4me2StdAln	0.0295	0.808084
EGR1_all	0.0294	0.808403
SMARCC1_all	0.029	0.809685
NR2F2_all	0.029	0.809685
E2F1_all	0.0287	0.810654
NFYB_all	0.0284	0.811627
NFATC1_all	0.0283	0.811953
wgEncodeUwDnaseNB4	0.0282	0.812279
wgEncodeOpenChromFaireA549Pk	0.0282	0.812279
BACH1_all	0.0271	0.81591
HNF4A_all	0.0266	0.817586
wgEncodeUWDukeDnaseHeLaS3	0.0263	0.818599
ELK1_all	0.0259	0.81996
wgEncodeUWDukeDnaseHSMMtube	0.0257	0.820645
wgEncodeUwDnaseNHDFAd	0.0256	0.820988
wgEncodeUwDnaseGM06990	0.0253	0.822022
wgEncodeDukeDnasePanIslets	0.0251	0.822716
T-bet_Th1_10-7-peaks	0.0249	0.823412
TAF7_all	0.0228	0.830905
ELK4_all	0.0224	0.832372
ZBTB33_all	0.0214	0.836102
SRF_all	0.0198	0.842265
NFYA_all	0.0196	0.843053
ATF1_all	0.0196	0.843053
wgEncodeUwDnasePANC1	0.0193	0.844243
wgEncodeUwDnaseSAEC	0.019	0.845443
wgEncodeUwDnaseHAc	0.0187	0.846653
wgEncodeUwDnaseRPTEC	0.0185	0.847465
RELA_all	0.0184	0.847873
CTBP2_all	0.018	0.849515
CHD2_all	0.018	0.849515
wgEncodeUWDukeDnaseHMEC	0.0177	0.85076
wgEncodeOpenChromFaireMedulloPk	0.0175	0.851596
wgEncodeUwDnaseHCM	0.0174	0.852015
wgEncodeBroadHistoneK562H3k79me2StdAln	0.0173	0.852436
BRCA1_all	0.0173	0.852436
wgEncodeUwDnaseAoAF	0.0171	0.853282
wgEncodeUwDnaseH7hESC	0.0166	0.855419
MYC_all	0.0166	0.855419
MEF2C_all	0.0164	0.856283
GATA3_Th2	0.0163	0.856717
BCLAF1_all	0.0161	0.857589
PAX5_all	0.016	0.858028
wgEncodeUwDnaseNHA	0.0159	0.858467
SMARCA4_all	0.0157	0.859351
wgEncodeBroadHistoneGm12878H3k4me1StdAln	0.0148	0.863401
wgEncodeUwDnaseHMVECLLy	0.0147	0.863859
JUN_all	0.0145	0.864779
ZNF274_all	0.0144	0.865242
SIX5_all	0.0143	0.865706
NR2C2_all	0.014	0.867109
wgEncodeUwDnaseHMVECdAd	0.0134	0.869962
wgEncodeDukeDnaseUrothelia	0.0133	0.870444
NRF1_all	0.0128	0.872881
wgEncodeUwDnaseAG09319	0.0121	0.876377
wgEncodeUwDnaseWI38	0.0119	0.877395
wgEncodeUwDnaseHCF	0.0118	0.877907
wgEncodeOpenChromFaireUrotsaPk	0.0112	0.881028
wgEncodeBroadHistoneHsmmtH3k4me2StdAln	0.0112	0.881028
SP2_all	0.0111	0.881556
PBX3_all	0.0111	0.881556
BHLHE40_all	0.0106	0.884235
wgEncodeBroadHistoneHepg2H3k79me2StdAln	0.0105	0.884779
wgEncodeBroadHistoneH1hescH3k4me3StdAln	0.0101	0.88698
ZKSCAN1_all	0.0099	0.888097
wgEncodeDukeDnaseUrotheliaUT189	0.0098	0.88866
wgEncodeBroadHistoneHsmmH3k79me2StdAln	0.0097	0.889226
MBD4_all	0.0092	0.892101
ZEB1_all	0.0084	0.896871
THAP1_all	0.0078	0.900603
SP4_all	0.0077	0.901239
wgEncodeUwDnaseHCPEpiC	0.0076	0.901879
wgEncodeDukeDnaseGliobla	0.0075	0.902523
wgEncodeBroadHistoneNhekH3k27me3StdAln	0.0071	0.905146
SPI1_all	0.007	0.905813
PRDM1_all	0.007	0.905813
GTF2B_all	0.0065	0.909224
NANOG_all	0.0064	0.909922
wgEncodeBroadHistoneNhaH3k27acStdAln	0.0058	0.914231
HDAC8_all	0.0058	0.914231
SIRT6_all	0.0053	0.917998
SMARCC2_all	0.0048	0.921949
ZNF143_all	0.0047	0.922763
wgEncodeBroadHistoneGm12878H4k20me1StdAln	0.0047	0.922763
RCOR1_all	0.0042	0.926975
IRF3_all	0.0041	0.927847
KDM5A_all	0.004	0.92873
wgEncodeBroadHistoneNhlfH3k27me3StdAln	0.0037	0.931448
wgEncodeDukeDnaseChorion	0.0036	0.932378
wgEncodeUwDnasePrEC	0.0035	0.933322
NFE2_all	0.0034	0.934279
MYBL2_all	0.0034	0.934279
wgEncodeBroadHistoneHsmmtH4k20me1StdAln	0.0028	0.940347
HSF1_all	0.0028	0.940347
wgEncodeUwDnaseHL60	0.0027	0.94142
PPARGC1A_all	0.0026	0.942514
NR3C1_all	0.0025	0.943628
CREB1_all	0.0023	0.945926
wgEncodeOpenChromFaireUrotsaUt189Pk	0.002	0.949571
wgEncodeBroadHistoneOsteoblH3k4me2StdAln	0.0019	0.950846
FAM48A_all	0.0019	0.950846
BRF2_all	0.0019	0.950846
HDAC6_all	0.0018	0.952156
wgEncodeBroadHistoneNhlfH3k4me3StdAln	0.0017	0.953502
YY1_all	0.0015	0.95632
JUND_all	0.0015	0.95632
ZZZ3_all	0.0014	0.9578
GTF3C2_all	0.0014	0.9578
wgEncodeDukeDnaseGM18507	0.0013	0.959333
wgEncodeUwDnaseHCT116	0.0012	0.960927
wgEncodeBroadHistoneNhlfH3k9acStdAln	0.0012	0.960927
RDBP_all	0.0012	0.960927
GRp20_all	0.0009	0.966159
wgEncodeDukeDnaseHTR8svn	0.0008	0.968093
POLR3G_all	0.0007	0.970153
CTCFL_all	0.0007	0.970153
wgEncodeUwDnaseHRE	0.0004	0.977435
BRF1_all	0.0004	0.977435
wgEncodeBroadHistoneHelas3H3k79me2StdAln	0.0003	0.980458
POU5F1_all	0.0002	0.984043
wgEncodeUwDnaseHConF	0	1
wgEncodeUwDnaseAG04450	0	1
wgEncodeOpenChromFaireHelas3Ifna4hPk	0	1
